# Supplementary material for: Confining ultrasmall Au nanoclusters in an ionic Ir(iii)-based cage for selective photoreduction
Source: Royal Society of Chemistry journal article supplement (doi:10.1039/d6sc01364c), 2026-04-23
Supplement: d6sc01364c1.pdf [file d6sc01364c1.pdf]

## Supporting Information

### Confining Ultrasmall Au Nanoclusters in an Ionic Ir(III)- Based Cage for Selective Photoreduction

Zhuolin Shi,<sup>a</sup> Fengyang Yu,<sup>b</sup> Jinguo Wu,<sup>a</sup> Yongai Yu\*,<sup>a</sup> Hanshu Li,<sup>a</sup> Xing Zhao,<sup>a</sup> Rong Zhang,<sup>a</sup> Wenjing Jiang,<sup>c</sup> Yiwei Liu,<sup>a</sup> Jianwei Wei,<sup>d</sup> Xuezhao Li\*,<sup>a</sup> and Cheng He<sup>a</sup>

*a* Central Hospital of Dalian University of Technology, School of Chemistry, School of Chemical Engineering, Dalian University of Technology, Dalian 116024, China;

E-mail: [xuezhao@dlut.edu.cn](mailto:xuezhao@dlut.edu.cn); [yuyongai@dlut.edu.cn](mailto:yuyongai@dlut.edu.cn)

*b* College of Chemistry, Xinjiang University, Xinjiang, 830046, China.

*c* Fujian Science & Technology Innovation Laboratory for Optoelectronic Information of China, Fuzhou, Fujian 350108, China.

*d* Hebei Technology Innovation Center for Energy Conversion Materials and Devices, College of Chemistry and Materials Science, Hebei Normal University, Shijiazhuang 050024, China.

# Table of Contents

|                                                                                                    |    |
|----------------------------------------------------------------------------------------------------|----|
| Section 1. Instruments.....                                                                        | 3  |
| Section 2. Experimental Details.....                                                               | 4  |
| 2.1 UV-vis and Fluorescence Measurements .....                                                     | 4  |
| 2.2 High-angle annular dark-field scanning transmission electronmicroscopy (HAADF-STEM) .....      | 4  |
| 2.3 General procedure for photoreduction of nitrobenzenes .....                                    | 4  |
| 2.4 Dynamic tracking experiments .....                                                             | 4  |
| 2.5 Binding affinities experiments.....                                                            | 4  |
| 2.6 Time-dependent DRIFTS adsorption/desorption experiment.....                                    | 6  |
| 2.6.1 CO adsorption.....                                                                           | 6  |
| 2.6.2 Substrates adsorption/desorption.....                                                        | 6  |
| 2.7 Electrochemical measurement .....                                                              | 6  |
| Section 3. Computational Details .....                                                             | 7  |
| 3.1 DFT calculations.....                                                                          | 7  |
| 3.2 Electron density distribution calculation .....                                                | 7  |
| 3.3 Adsorption energies calculations .....                                                         | 7  |
| Section 4. Synthetic Procedures and Characterization .....                                         | 8  |
| 4.1 Synthesis and characterization of $\Delta_2R_6$ - <b>Hp</b> .....                              | 8  |
| 4.1.1 Synthesis of $\Delta_2R_6$ - <b>Hi</b> .....                                                 | 8  |
| 4.1.2 Synthesis of $\Delta_2R_6$ - <b>Ha</b> .....                                                 | 10 |
| 4.1.3 Synthesis of $\Delta_2R_6$ - <b>Hp</b> .....                                                 | 18 |
| 4.2 Synthesis and characterization of $\Delta_2S_6$ - <b>Hp</b> .....                              | 26 |
| 4.3 CD and CPL characterization .....                                                              | 29 |
| 4.4 Synthesis and characterization of Au@ $\Delta_2R_6$ - <b>Hp</b> .....                          | 30 |
| 4.5 Synthesis and characterization of Au@ $\Delta_2S_6$ - <b>Hp</b> .....                          | 34 |
| 4.6 Synthesis and characterization of Au/ $\Delta_2R_6$ - <b>Ha</b> .....                          | 35 |
| Section 5. Evaluation of Catalytic Performance .....                                               | 37 |
| Section 6. Computational Studies .....                                                             | 43 |
| 6.1 Geometric structures optimized.....                                                            | 43 |
| 6.11 Geometry-optimized structure of $\Delta_2R_6$ - <b>Ha</b> and $\Delta_2R_6$ - <b>Hp</b> ..... | 43 |
| 6.12 Geometry-optimized structure of Au@ $\Delta_2R_6$ - <b>Ha</b> .....                           | 43 |
| 6.13 Adsorption geometries.....                                                                    | 44 |
| 6.2 Reaction energies calculations.....                                                            | 44 |
| Section 7. $^1\text{H}$ NMR spectra of catalytic products .....                                    | 46 |
| Section 8. References.....                                                                         | 52 |

## Section 1. Instruments

Starting materials, reagents, and solvents were purchased from commercial vendors and used as received, unless otherwise noted. All organic solvents were dried and distilled over an appropriate drying agent under an argon atmosphere.

Column chromatography was performed over silica gel (100-200 mesh or 200-300 mesh).  $^1\text{H}$ ,  $^{13}\text{C}$  and 2D NMR spectra were recorded on a Bruker Advance 400 MHz spectrometer. The chemical shifts are listed in ppm on the  $\delta$  scale and coupling constants were recorded in Hz. The following abbreviations were used to identify signal multiplicities: s, singlet; d, doublet; t, triplet; b, broad peaks; m, multiplet or overlapping peaks.  $^1\text{H}$  assignments were made using 2D NMR methods (COSY, NOESY, HSQC, HMBC).

High-resolution quadrupole time-of-flight mass spectrometry (HR-Q-TOF-MS) was carried out on a Q-TOF MS spectrometer (Synapt G2-Si HDMS) using methanol as mobile phase.

The luminescent spectra and the decay spectra were measured with Edinburgh Instruments (FLS-1000) under anaerobic conditions. The photoluminescence decay spectra were measured with Edinburgh Instruments FLS-1000 instrument under anaerobic conditions. The photoluminescence quantum yields ( $\Phi_{\text{PL}}$ ) of the samples were measured on C13534 UV-NIR absolute PL Quantum Yield Spectrometer under anaerobic conditions.

UV-vis spectra were measured on a HP 8453 spectrometer.

X-ray photoelectron spectroscopy (XPS) was measured on a Near Ambient Pressure XPS system (SPECS Surface Nano Analysis GmbH, Proven-X NAP). In-situ illumination was conducted under a Xenon lamp (300 W) for 1 h. The obtained data were analyzed using XPSPEAK software with Shirley background subtraction and Gaussian-Lorentzian peak fitting, the C peak at 284.5 eV was used as a reference to correct for charging effects.

Zeta potential analysis was measured on Zetasizer Nano ZS90. Prior to the measurement, the samples were dispersed in water solutions using ultrasonic treatment to achieve a uniform dispersion.

The transmission electron microscopy (TEM) and Energy Dispersive Spectrometer (EDS) mapping were performed on Field Emission Transmission Electron Microscope (JEM-F200). The spherical aberration corrected Transmission Electron Microscopes (ACTEM) were carried out on Thermo Fisher Scientific Instruments (themis Z).

Powder X-ray diffraction (PXRD) tests were performed on SmartLab 9kw X-ray diffractometer instrument with a Cu sealed tube.

Inductively coupled plasma-optical emission spectrometry (ICP-OES) analyses were performed on PerkinElmer Avio 220.

Circular dichroism (CD) measurements were carried out on a JASCO J-810 spectrometer.

Circularly Polarized Luminescence (CPL) was carried out using a JASCO CPL-300 spectrometer under anaerobic conditions.

The light source used in catalysis measurement is 450 nm LED, which were purchased from the

Beijing China Education Au-light Co., Ltd.

In situ DRIFTS was performed on a Bruker Vertex 70v spectrometer equipped with an MCT detector at a resolution of  $4\text{ cm}^{-1}$  with 128 scans. Sample was placed in a Harrick cell with  $\text{CaF}_2$  windows.

Electrochemical tests were performed on CHI 760E Electrochemical Workstation under anaerobic conditions.

## Section 2. Experimental Details

### 2.1 UV-vis and Fluorescence Measurements

The samples ( $1.0 \times 10^{-5}\text{ M}$ ) in DMSO were taken at UV-vis measurements. The fluorescence spectra and photoluminescence quantum yields ( $\Phi_{\text{PL}}$ ) experiments were carried out using the samples ( $1.0 \times 10^{-5}\text{ M}$ ) in DMSO under anaerobic conditions. The photoluminescence decay experiments were obtained with a 405 nm laser with samples ( $1.0 \times 10^{-5}\text{ M}$ ) in DMSO under anaerobic conditions.

### 2.2 High-angle annular dark-field scanning transmission electron microscopy (HAADF-STEM)

HAADF-STEM samples were first dispersed in water and ultrasonicated to form a uniform suspension. A small amount of the suspension was then drop-cast onto carbon-coated copper grids and dried under ambient conditions prior to imaging.

### 2.3 General procedure for photoreduction of nitrobenzenes

The photocatalytic reduction of **NBs** was carried out in a 10 mL quartz tube reactor at room temperature under an argon atmosphere. Typically, as-prepared catalysts (1 mol%) was added into the reactor with a reactant mixture consisted of **NB** (0.1 mmol), NaOH (0.3 M), isopropyl alcohol (IPA, 2 mL). The system was purged with argon by bubbling through a fine-point needle for 15 min to remove dissolved oxygen. The tube was then sealed with a rubber septum to maintain an inert atmosphere. The reaction was conducted under 450 nm LED irradiation with continuous magnetic stirring. Upon completion, the reaction mixture was analyzed by  $^1\text{H}$  NMR spectroscopy. For recyclability tests, the catalyst was recovered after each cycle by centrifugation, washed three times with IPA, and reused directly in subsequent cycles without further treatment.

### 2.4 Dynamic tracking experiments

The in situ dynamic tracking experiments were conducted with **NB** and **AOB** as substrates, respectively. Aliquots were withdrawn at designated time intervals as the reaction proceeded, and the concentration changes of reactants and products were monitored using  $^1\text{H}$  NMR spectroscopy.

### 2.5 Binding affinities experiments

Binding affinities between  $\text{Au}@A_2R_6\text{-Ha}$  and substrates were evaluated by luminescence

quenching experiments. Au@A<sub>2</sub>R<sub>6</sub>-Ha (1.0 × 10<sup>-5</sup> M, in IPA) was titrated with increasing amounts of substrate under anaerobic conditions. The emission spectra were recorded upon excitation at 405 nm. The quenching behavior was analyzed by fitting the titration curves to determine binding parameters.

(1) For the nonlinear fitting of the host-guest binding system:<sup>[S1]</sup>

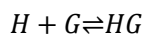

Here, *H* was the host (Au@A<sub>2</sub>R<sub>6</sub>-Ha), *G* was the guest (substrates) and *HG* was the complex.

$$[HG] = K_a[H][G] = K_a([H]_0 - [HG])([G]_0 - [HG])$$

Here, *K<sub>a</sub>* was the association constant of the system, [*H*] was the concentration of the host, [*G*] was the concentration of the guest and [*HG*] was the concentration of the complex.

$$[HG]^2 - ([H]_0 + [G]_0 + \frac{1}{K_a})[HG] + [H]_0[G]_0 = 0$$

Solution of quadratic equation of one variable:

$$[HG] = \frac{\left([H]_0 + [G]_0 + \frac{1}{K_a}\right) - \sqrt{\left([H]_0 + [G]_0 + \frac{1}{K_a}\right)^2 - 4[H]_0[G]_0}}{2}$$

As in fluorescence spectra, each detection signal:

$$y = a[HG] + b[H] + c[G] = (a - b - c)[HG] + b[H]_0 + c[G]_0$$

Here, a, b and c are the constant.

$$y = \frac{\left([H]_0 + [G]_0 + \frac{1}{K_a}\right) - \sqrt{\left([H]_0 + [G]_0 + \frac{1}{K_a}\right)^2 - 4[H]_0[G]_0}}{2} + b[H]_0 + c$$

[*G*]<sub>0</sub>

*y* and [*G*]<sub>0</sub> could be fitted with this equation.

Alternatively, under most conditions, the guest does not respond at the detection signal, the equation could be simplified as:

$$y = a[HG] + b[H] = (a - b)[HG] + b[H]_0$$

$$y = (a - b) \frac{\left([H]_0 + [G]_0 + \frac{1}{K_a}\right) - \sqrt{\left([H]_0 + [G]_0 + \frac{1}{K_a}\right)^2 - 4[H]_0[G]_0}}{2} + b[H]_0$$

Let *k* = (*a* - *b*), *y*<sub>0</sub> = *b*[*H*]<sub>0</sub>

$$y = k \frac{([H]_0 + [G]_0 + \frac{1}{K_a}) - \sqrt{([H]_0 + [G]_0 + \frac{1}{K_a})^2 - 4[H]_0[G]_0}}{2} + y_0$$

Here, the nonlinear fitting of  $y$  and  $[G]_0$  is followed this equation.

(2) Stern-Volmer equation:<sup>[S2]</sup>

$$\frac{F_0}{F} = 1 + K_{SV} [G]$$

Here,  $K_{SV}$  was the Stern-Volmer constants of the system,  $F_0$  and  $F$  are the emission intensity in the absence and presence of substrate, respectively;  $[G]$  is the concentration of the substrate.

## 2.6 Time-dependent DRIFTS adsorption/desorption experiment

### 2.6.1 CO adsorption

Time-dependent DRIFTS of CO adsorption was performed on a Bruker Vertex 70v spectrometer equipped with an MCT detector (resolution: 4  $\text{cm}^{-1}$ , 64 scans per spectrum). Approximately 20.0 mg of catalyst was evenly spread in a Harrick in situ DRIFTS cell to ensure full coverage and adequate sample height for effective gas–solid interaction.

Prior to CO dosing, high-purity argon (1200  $\text{mL h}^{-1}$ ) was passed through the cell for at least 1 h to remove residual air, moisture, and  $\text{CO}_2$ . Background spectra were collected after signal stabilization. CO gas (800  $\text{mL h}^{-1}$ ) was then introduced for 2 h, during which spectra were recorded at regular intervals to monitor adsorption. After equilibrium was reached, CO was purged with argon until no further change in peak intensity was observed, indicating complete desorption of weakly bound species. The sample was then irradiated in situ with a 450 nm LED while exposed to CO (500  $\text{mL min}^{-1}$ ) at room temperature for 15 min. Final spectra were collected after argon purging to remove residual CO.

### 2.6.2 Substrates adsorption/desorption

Substrate adsorption and desorption experiments were performed similarly to the CO adsorption protocol with minor modifications. A parallel U-tube was connected to the gas inlet; its outlet was packed with cotton to prevent liquid backflow. Model substrates dissolved in a  $\text{CH}_2\text{Cl}_2/\text{MeOH}$  mixture (10 mL, 1:1 v/v) were placed at the bottom of the U-tube. Argon gas (400  $\text{mL h}^{-1}$ ) was passed through the U-tube to volatilize the substrate and deliver it into the DRIFTS cell in the vapor phase. After adsorption equilibrium was reached, desorption was monitored by purging with argon and gradually increasing the temperature to 60  $^\circ\text{C}$  while recording spectra to track desorption behavior.

## **2.7 Electrochemical measurement**

All electrochemical tests were performed on CHI 660E Electrochemical Workstation with a conventional three-electrode system. Photocurrent measurements and electrochemical impedance spectroscopy (EIS) were performed with the catalyst-coated FTO as the working electrode, a platinum wire as a counter electrode and an Ag/AgCl reference electrode, in an aqueous solution of  $\text{Na}_2\text{SO}_4$  (0.1 M). The 2 mg of catalyst was added into 0.5 mL of ethanol and 20  $\mu\text{L}$  of Nafion mixed solution. Then a 100  $\mu\text{L}$  suspension was dropped on the surface of the FTO glass with an area of 1.0  $\text{cm}^2$  and dried at room temperature for measurements. The photocurrent density was recorded after an initial equilibration period to ensure a stable baseline for comparison.

## Section 3. Computational Details

### 3.1 DFT calculations

The geometric structures of  $\Delta_2R_6\text{-Ha}$ ,  $\Delta_2R_6\text{-Hp}$ ,  $\text{Au}@A_2R_6\text{-Ha}$ ,  $\text{NB-Au}@A_2R_6\text{-Ha}$ ,  $\text{AOB-Au}@A_2R_6\text{-Ha}$  and  $\text{AB-Au}@A_2R_6\text{-Ha}$  were optimized by density functional theory (DFT) calculations using B97D hybrid functional with D2 version of Grimme's dispersion.<sup>[S3, S4]</sup> The basis set was using LANL2DZ for Ir and Au,<sup>[S5]</sup> and 6-31G(d) for other elements.<sup>[S6]</sup> All the DFT calculations were performed using Gaussian 16 (Revision B.01) package.<sup>[S7]</sup>

### 3.2 Electron density distribution calculation

The electron density distribution (EDD) of the electron-hole orbitals in  $\text{Au}@A_2R_6\text{-H}$  during the  $S_0 \rightarrow S_1$  transition was analyzed with Multiwfn and visualized by VMD.<sup>[S8-S11]</sup>

### 3.3 Adsorption energies calculations

The adsorption energies ( $E_{\text{ads}}$ ) was calculated as:

$$\Delta E_{\text{ads}} = E_{\text{ad}}^* - E^* - E_{\text{ad}}$$

where  $E_{\text{ad}}^*$  is the total energy of system,  $E^*$  and  $E_{\text{ad}}$  are the energies of the substrate  $\text{Au}@A_2R_6\text{-Ha}$  structure and the adsorbed substrates, respectively.

## Section 4. Synthetic Procedures and Characterization

All reactions were performed under Ar atmosphere and using dry solvents unless otherwise stated.

### 4.1 Synthesis and characterization of $\Delta_2R_6$ -Hp

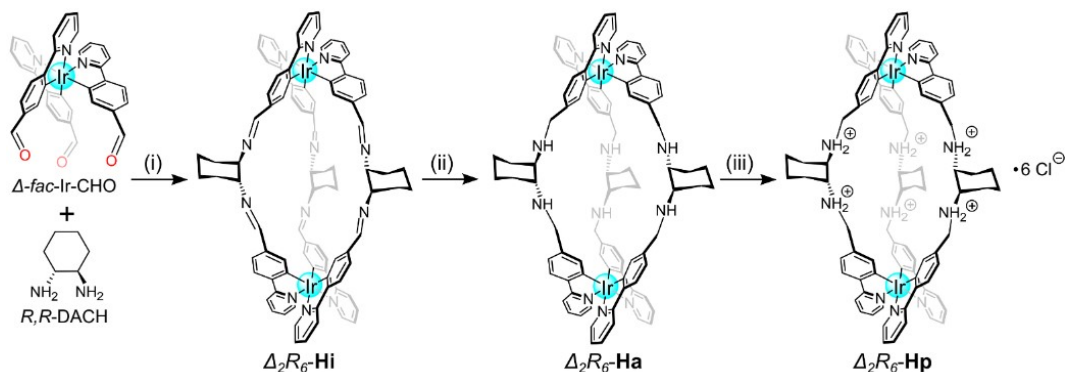

**Scheme S1** Synthesis of enantiomeric  $\Delta_2R_6$ -Hp. Reaction conditions: (i) p-Toluenesulfonic acid (TsOH), CH<sub>3</sub>CN, Toluene, 110 °C, 12 h, 90% in total; (ii) NaBH<sub>4</sub>, MeOH, CH<sub>2</sub>Cl<sub>2</sub>, room temperature, 12 h, 93%; (iii) HCl 0.1 M, MeOH, room temperature, 98%.

#### 4.1.1 Synthesis of $\Delta_2R_6$ -Hi

The cyclometalate ligands  $\Delta$ -fac-Ir-CHO and the corresponding assembly  $\Delta_2R_6$ -Hi were synthesized according to our reported procedures. [S12]

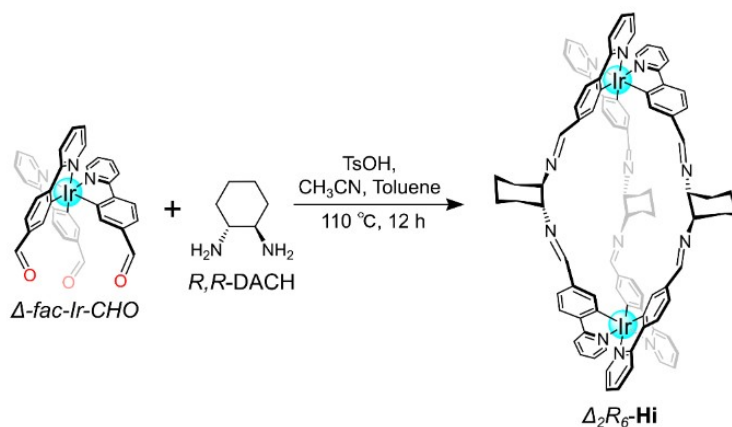

**Scheme S2** Synthesis route of  $\Delta_2R_6$ -Hi.

In detail,  $\Delta$ -fac-Ir-CHO (37 mg, 0.05 mmol), *R,R*-DACH (8.8 mg, 0.075 mmol) and p-Toluene sulfonic acid (TsOH) (2.6 mg, 0.015 mmol) was dissolved in a mix solvent of acetonitrile (10 mL) and toluene (20 mL). The mixture was stirred at 110 °C for 12 h under argon. After cooling to room temperature, the solvent was removed under vacuum and the solid was dissolved in CH<sub>2</sub>Cl<sub>2</sub>. Diethyl ether was diffused into CH<sub>2</sub>Cl<sub>2</sub> solution and got the orange crystals. The crystals were washed with diethyl ether, and afforded  $\Delta_2R_6$ -Hi after drying in 90 % yield (38 mg).

**HR-Q-TOF-MS:**  $m/z$  [ $M + H$ ]<sup>+</sup> calcd for [C<sub>90</sub>H<sub>79</sub>Ir<sub>2</sub>N<sub>12</sub>]<sup>+</sup>:1712.5819, found: 1713.5775.

**<sup>1</sup>H NMR** (500 MHz, CD<sub>2</sub>Cl<sub>2</sub>, ppm)  $\delta$  7.98 (s, 1H), 7.96 (s, 1H), 7.71-7.67 (m, 2H), 7.63 (dd,  $J =$

1.5 Hz,  $J = 8.0$  Hz, 1H), 7.52 (d,  $J = 5.0$  Hz, 1H), 6.99-6.96 (m, 2H), 3.11 (s, 1H), 2.27 (m, 1H), 1.89 (m, 1H), 1.53 (m, 1H), 1.38 (d,  $J = 10.0$  Hz).

$^{13}\text{C}$  NMR (101 MHz,  $\text{CD}_2\text{Cl}_2$ , ppm)  $\delta$  166.3, 161.4, 160.6, 147.6, 146.3, 140.8, 137.7, 136.9, 124.5, 122.9, 119.8, 117.8, 73.1, 30.2, 21.8.

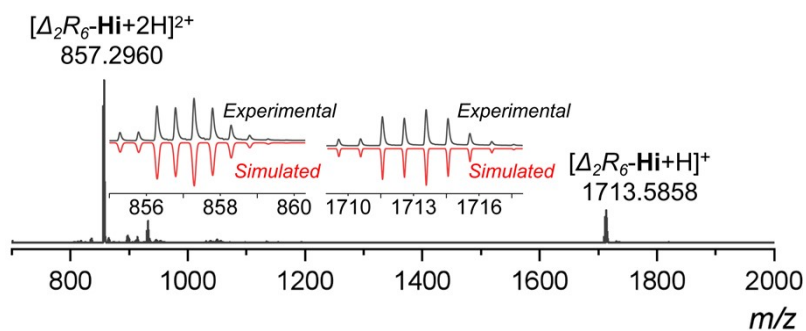

**Fig. S1** HR-Q-TOF-MS spectrum of  $\Delta_2R_6\text{-Hi}$ .

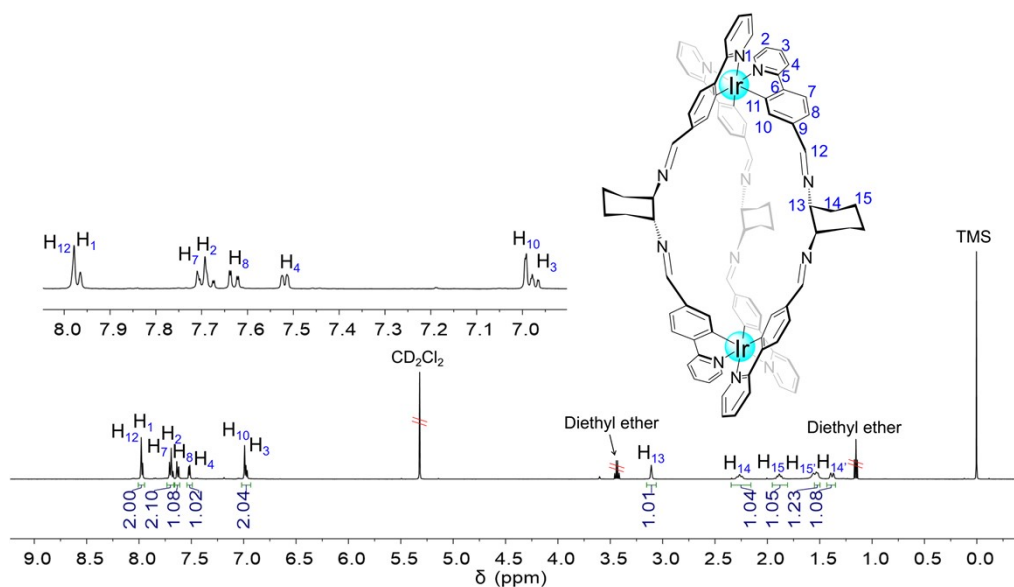

**Fig. S2**  $^1\text{H}$  NMR (400 MHz,  $\text{CD}_2\text{Cl}_2$ , 298 K) spectrum of  $\Delta_2R_6\text{-Hi}$ .

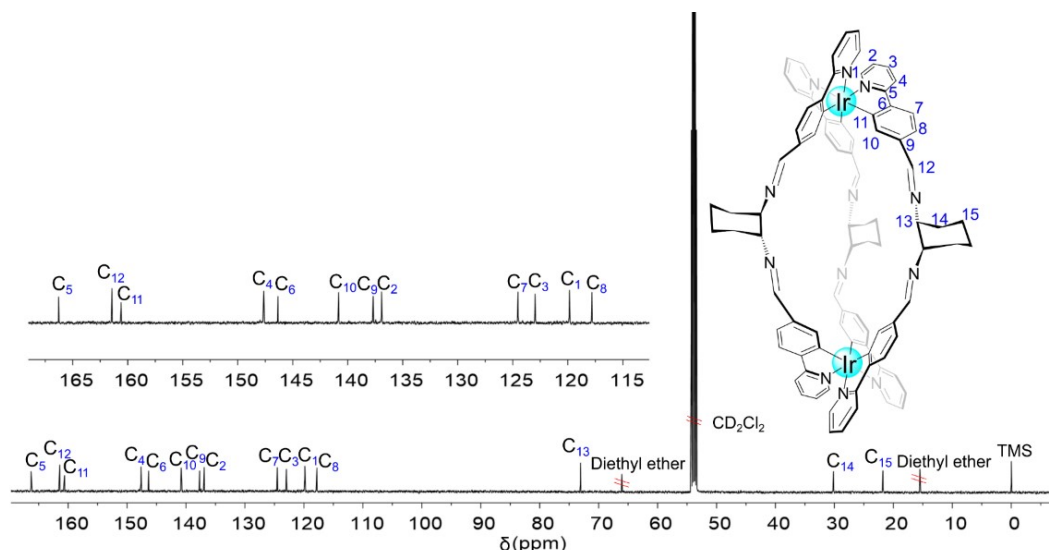

Fig. S3  $^{13}\text{C}$  NMR (101 MHz,  $\text{CD}_2\text{Cl}_2$ , 298 K) spectrum of  $\Delta_2R_6\text{-Hi}$ .

#### 4.1.2 Synthesis of $\Delta_2R_6\text{-Ha}$

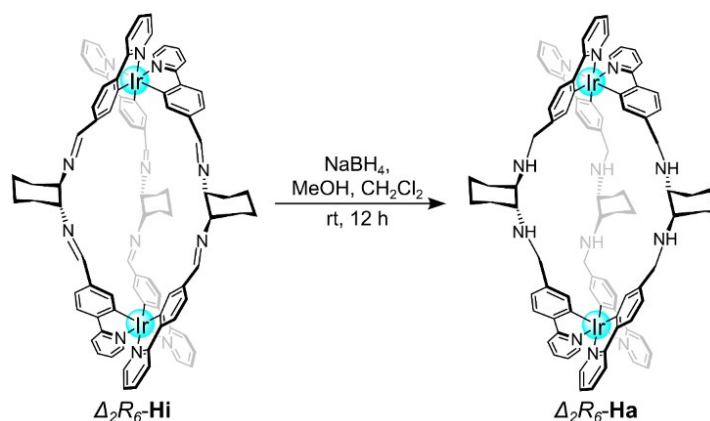

Scheme S3 Synthesis route of  $\Delta_2R_6\text{-Ha}$ .

$\Delta_2R_6\text{-Hi}$  (38 mg, 0.022 mmol) was dissolved in a mixture of methanol and dichloromethane (1: 1 v/v, 20 mL) under argon atmosphere. Following, sodium borohydride (16.5 mg, 0.48 mmol, 20 equiv.) was added in five batches at ice-water bath, and the reaction mixture was stirred at room temperature for a 12 h. Water (10 mL) was then added, and stirring was continued for an additional 2 h. The reaction mixture was extracted with  $\text{CH}_2\text{Cl}_2$ , and the organic layer was evaporated to yield a light yellow solid. The crude product was washed with diethyl ether and dried under vacuum to afford the product in 93% yield (35 mg).

**HR-Q-TOF-MS:**  $m/z$   $[M + 2\text{H}]^{2+}$  calcd for  $[\text{C}_{90}\text{H}_{92}\text{Ir}_2\text{N}_{12}]^{2+}$ : 863.3415, found: 863.3420;  $[M + 3\text{H}]^{3+}$  calcd for  $[\text{C}_{90}\text{H}_{93}\text{Ir}_2\text{N}_{12}]^{3+}$ : 575.8968, found: 575.8972.

**$^1\text{H}$  NMR** (400 MHz,  $\text{DMSO}-d_6$ )  $\delta$  8.07 (d,  $J = 8.4$  Hz, 1H,  $\text{H}_1$ ), 7.76 (td,  $J = 7.8, 1.7$  Hz, 1H,  $\text{H}_2$ ), 7.70 (d,  $J = 8.2$  Hz, 1H,  $\text{H}_7$ ), 7.42 (dd,  $J = 5.7, 1.6$  Hz, 1H,  $\text{H}_4$ ), 7.11 – 7.03 (m, 1H,  $\text{H}_3$ ), 6.88 (d,  $J$

= 8.0 Hz, 1H, H<sub>8</sub>), 6.59 – 6.52 (m, 1H, H<sub>10</sub>), 3.57 – 3.44 (m, 1H, H<sub>12</sub>), 3.18 (d, *J* = 12.0 Hz, 1H, H<sub>12'</sub>), 2.18 (s, 1H, H<sub>13</sub>), 1.87 (s, 1H, H<sub>14</sub>), 1.51 (d, *J* = 33.8 Hz, 2H, H<sub>15</sub>, HN), 1.14 (d, *J* = 34.3 Hz, 2H, H<sub>15'</sub>, H<sub>14'</sub>).

<sup>13</sup>C NMR (101 MHz, DMSO-*d*<sub>6</sub>) δ 166.14 (C<sub>5</sub>), 161.34 (C<sub>9</sub>), 147.10 (C<sub>4</sub>), 142.59 (C<sub>6</sub>), 141.9 (C<sub>11</sub>), 137.12 (C<sub>2</sub>, C<sub>10</sub>), 124.72 (C<sub>7</sub>), 122.77 (C<sub>3</sub>), 120.10 (C<sub>8</sub>), 119.22 (C<sub>1</sub>), 59.32 (C<sub>13</sub>), 52.22 (C<sub>12</sub>), 28.79 (C<sub>14</sub>), 22.95 (C<sub>15</sub>).

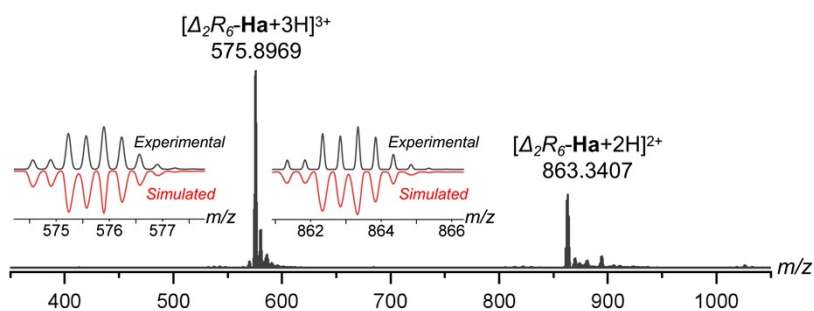

**Fig. S4** HR-Q-TOF-MS spectrum of  $\Delta_2R_6$ -Ha.

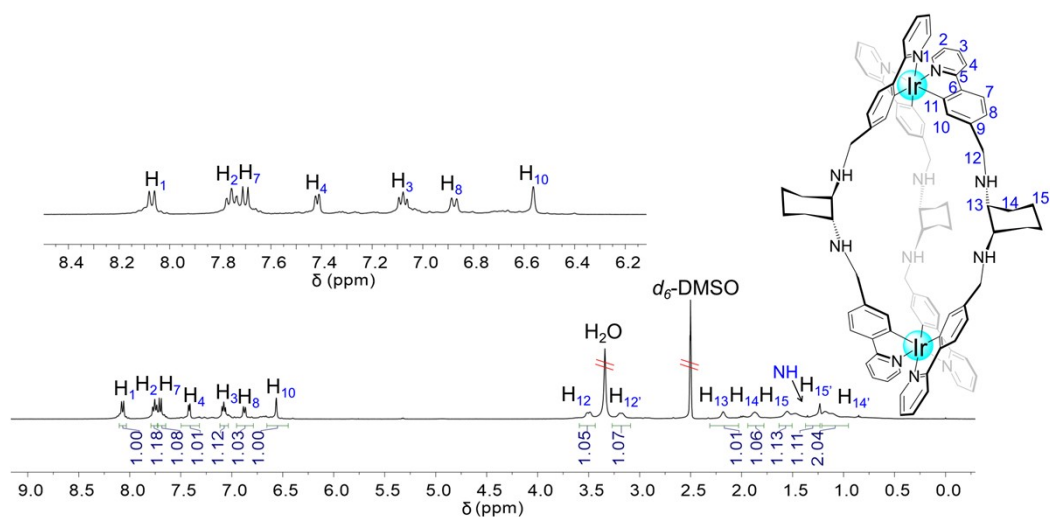

**Fig. S5** <sup>1</sup>H NMR (400 MHz, DMSO-*d*<sub>6</sub>, 298 K) spectrum of  $\Delta_2R_6$ -Ha.

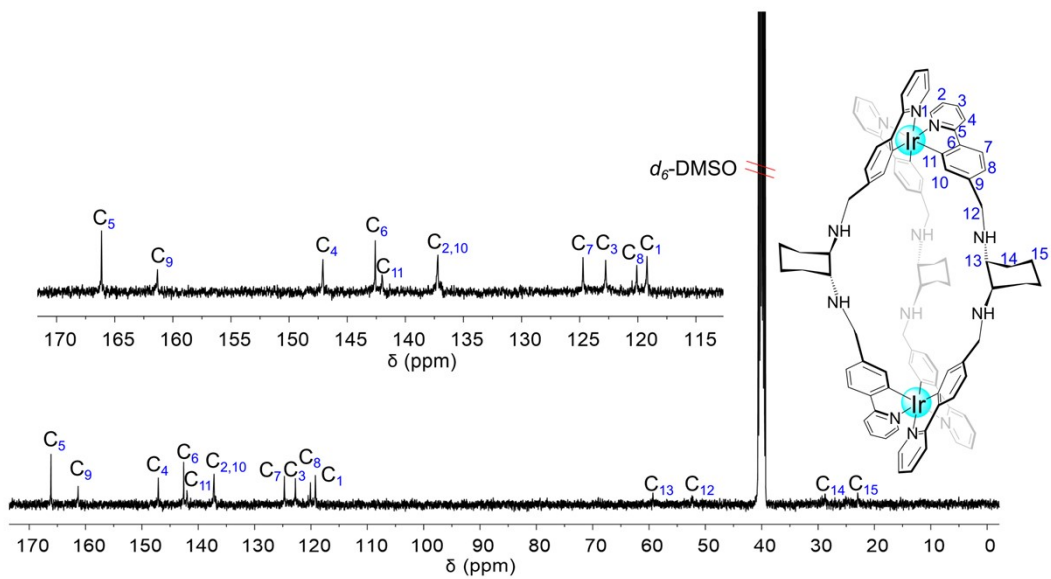

Fig. S6  $^{13}\text{C}$  NMR spectrum (101 MHz,  $\text{DMSO-}d_6$ , 298K) of  $\Delta_2R_6\text{-Ha}$ .

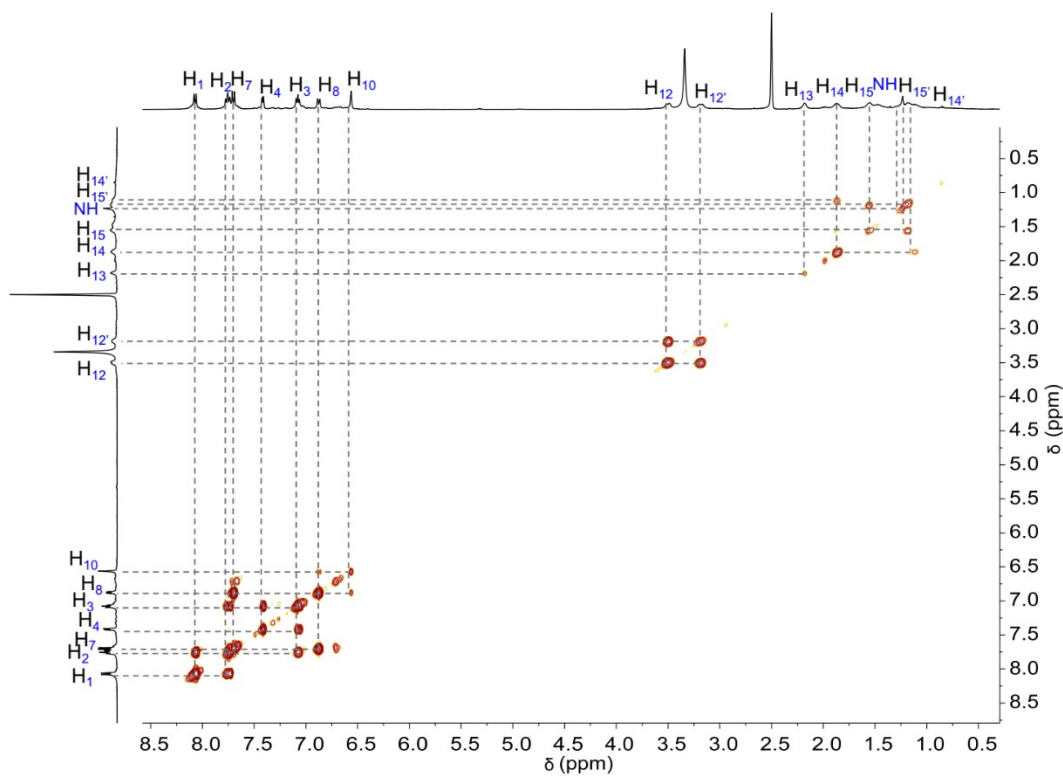

Fig. S7  $^1\text{H-}^1\text{H}$  COSY spectrum (400 MHz,  $\text{DMSO-}d_6$ , 298K) of  $\Delta_2R_6\text{-Ha}$ .

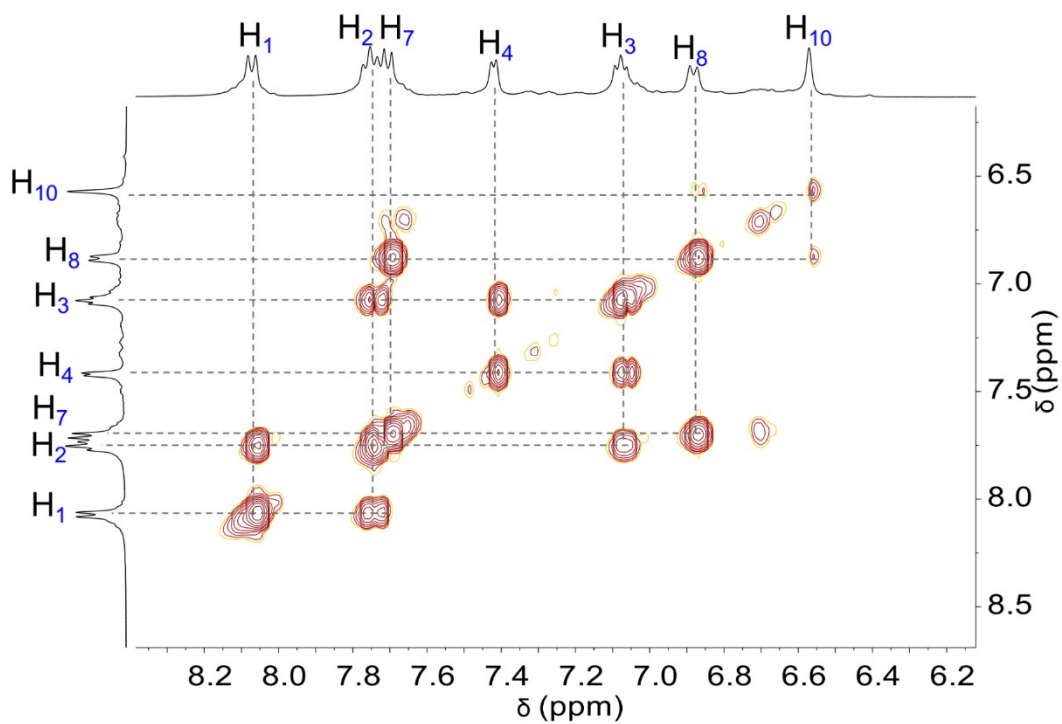

Fig. S8 Partial  $^1\text{H}$ - $^1\text{H}$  COSY spectrum (400 MHz,  $\text{DMSO-}d_6$ , 298K) of  $\Delta_2R_6\text{-Ha}$ .

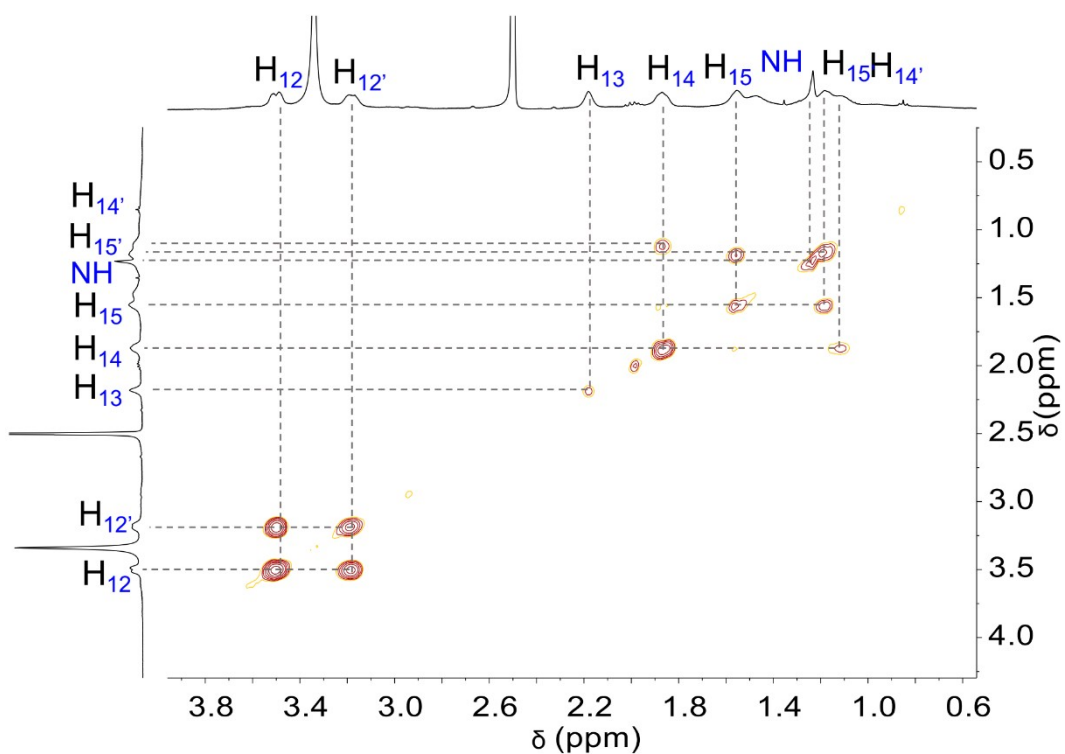

Fig. S9 Partial  $^1\text{H}$ - $^1\text{H}$  COSY spectrum (400 MHz,  $\text{DMSO-}d_6$ , 298K) of  $\Delta_2R_6\text{-Ha}$ .

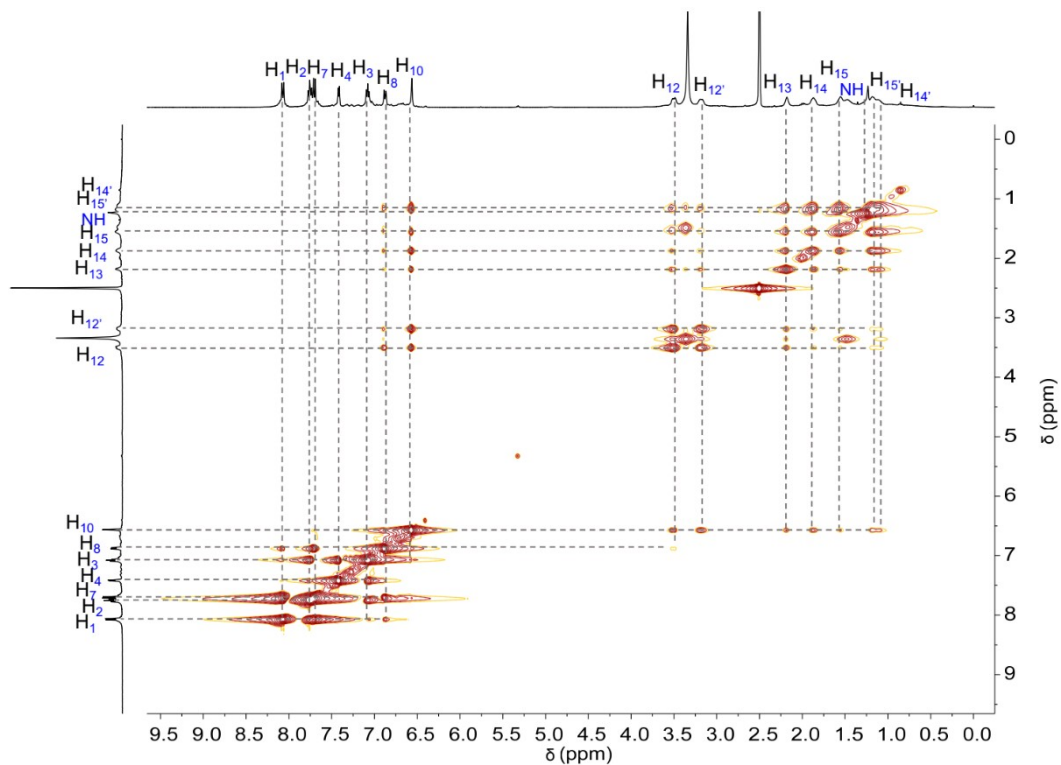

**Fig. S10**  $^1\text{H}$ - $^1\text{H}$  NOESY spectrum (400 MHz,  $\text{DMSO-}d_6$ , 298K) of  $\Delta_2R_6\text{-Ha}$ .

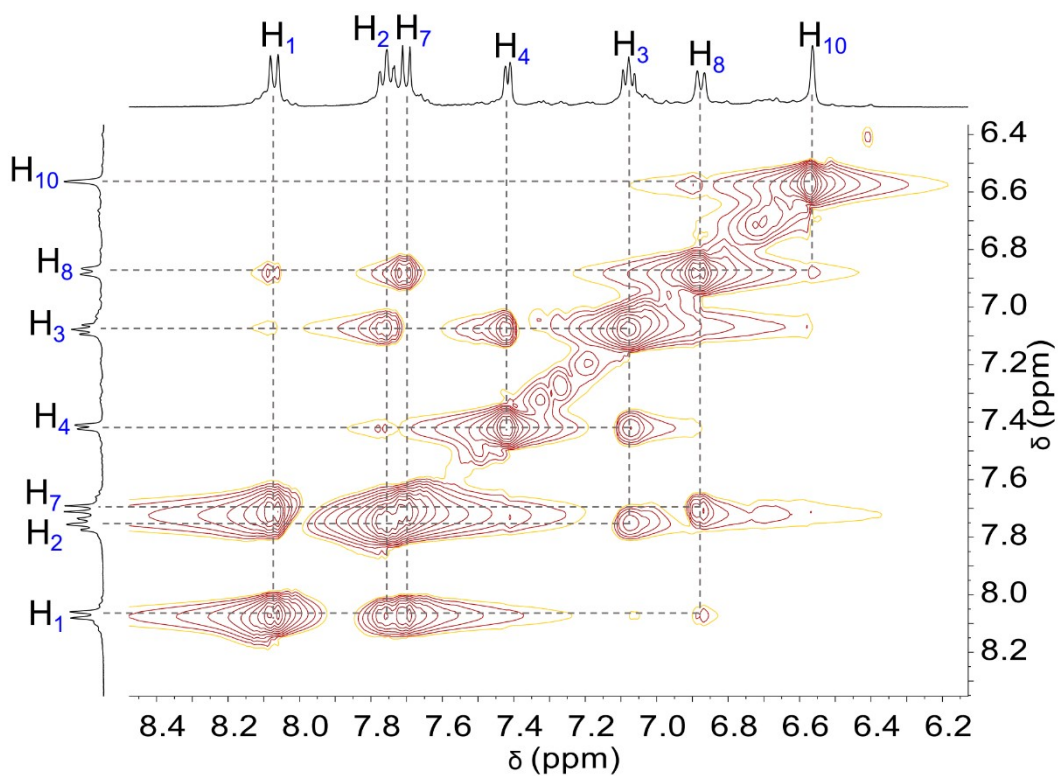

**Fig. S11** Partial  $^1\text{H}$ - $^1\text{H}$  NOESY spectrum (400 MHz,  $\text{DMSO-}d_6$ , 298K) of  $\Delta_2R_6\text{-Ha}$ .

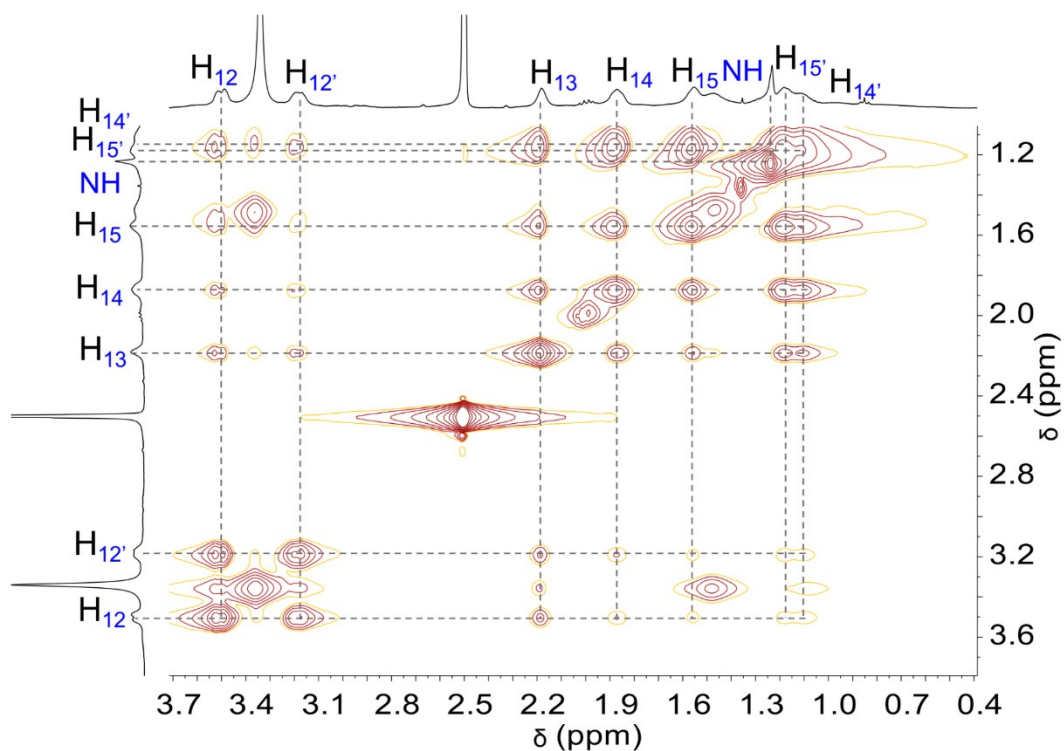

**Fig. S12** Partial  $^1\text{H}$ - $^1\text{H}$  NOESY spectrum (400 MHz,  $\text{DMSO-}d_6$ , 298K) of  $\Delta_2R_6\text{-Ha}$ .

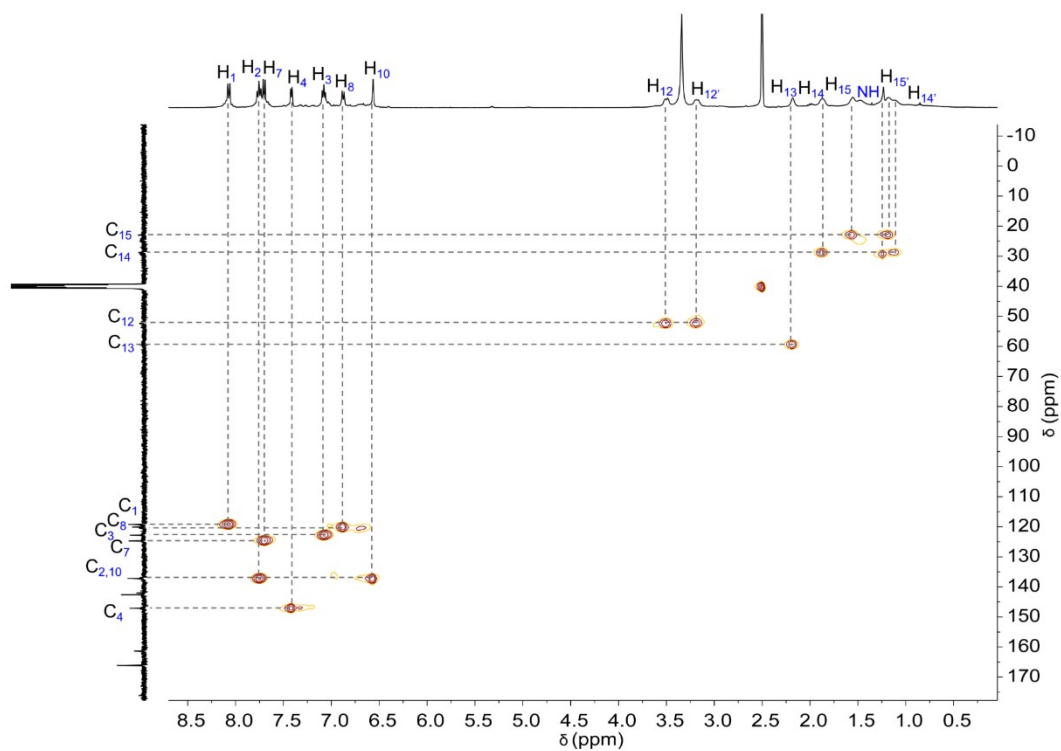

**Fig. S13**  $^1\text{H}$ - $^{13}\text{C}$  HSQC spectrum (400 MHz,  $\text{DMSO-}d_6$ , 298K) of  $\Delta_2R_6\text{-Ha}$ .

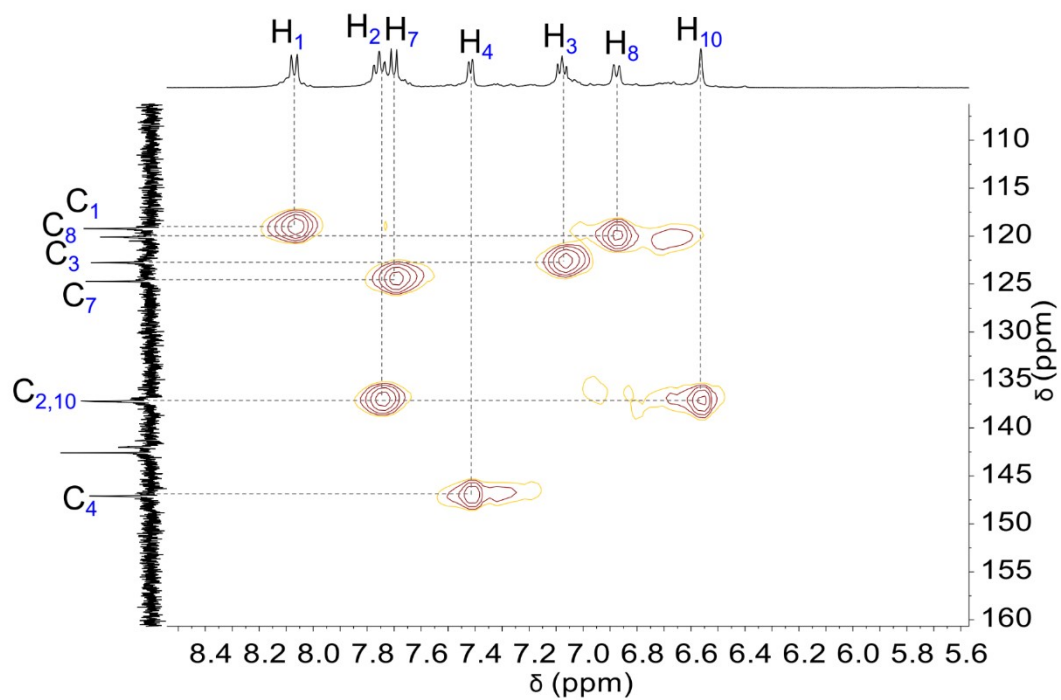

Fig. S14 Partial  $^1\text{H}$ - $^{13}\text{C}$  HSQC spectrum (400 MHz, DMSO- $d_6$ , 298K) of  $\Delta_2R_6$ -Ha.

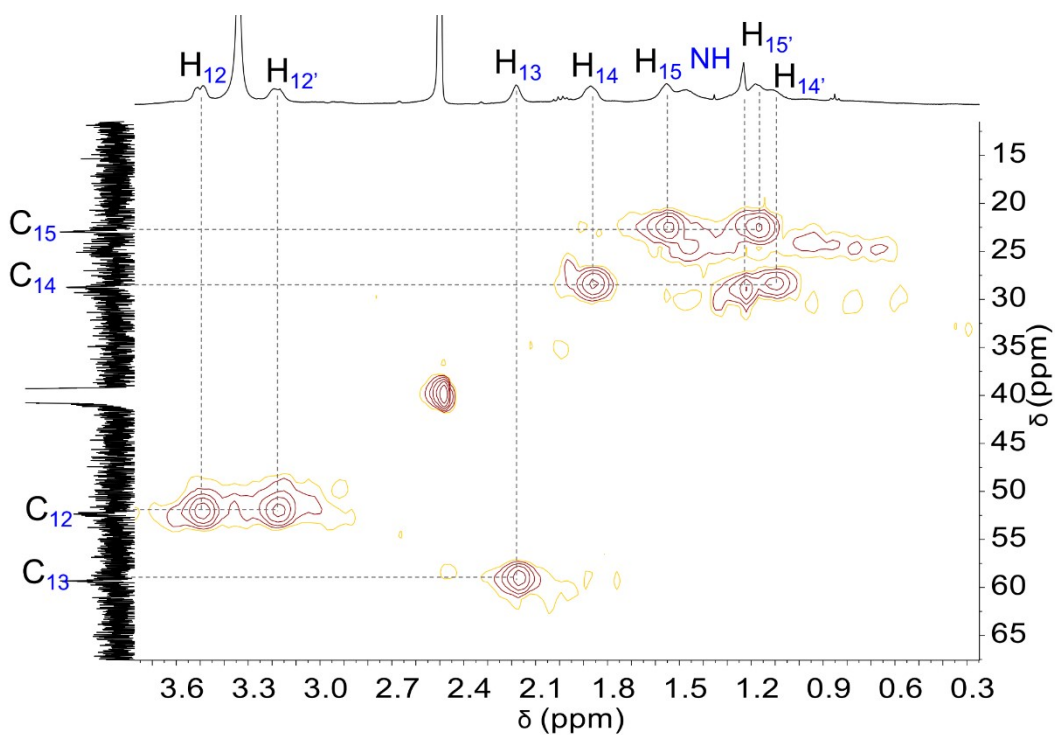

Fig. S15 Partial  $^1\text{H}$ - $^{13}\text{C}$  HSQC spectrum (400 MHz, DMSO- $d_6$ , 298K) of  $\Delta_2R_6$ -Ha.

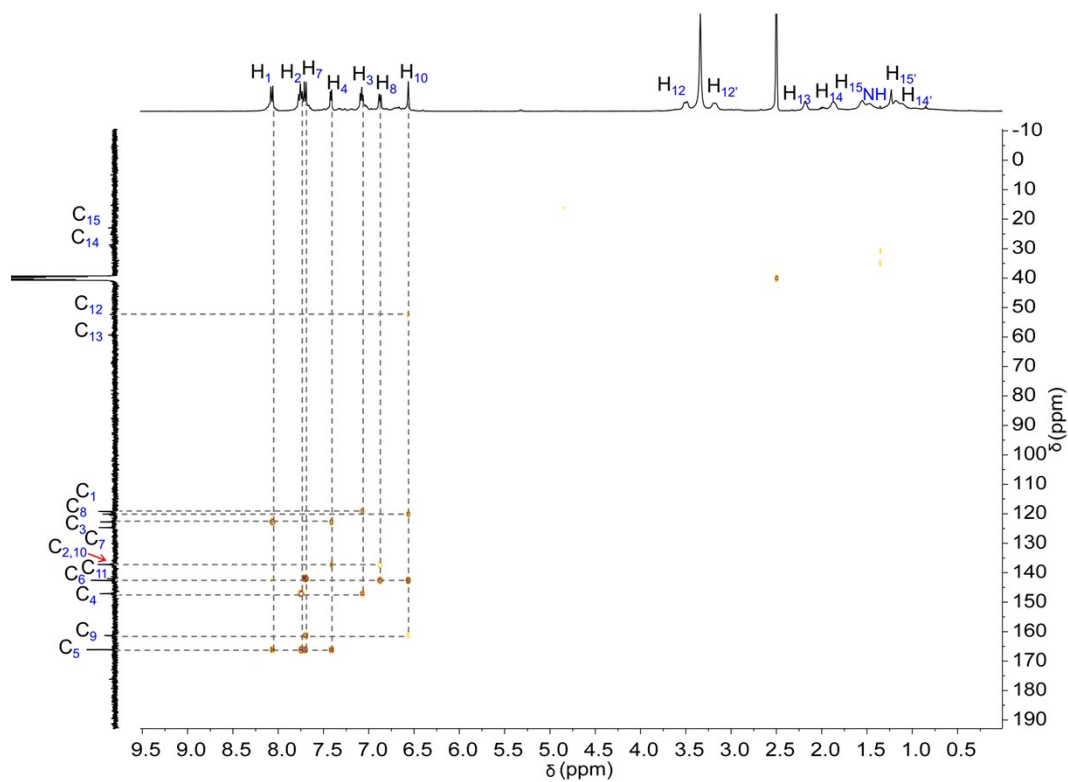

Fig. S16  $^1\text{H}$ - $^{13}\text{C}$  HMBC spectrum (400 MHz,  $\text{DMSO-}d_6$ , 298K) of  $\Delta_2R_6\text{-Ha}$ .

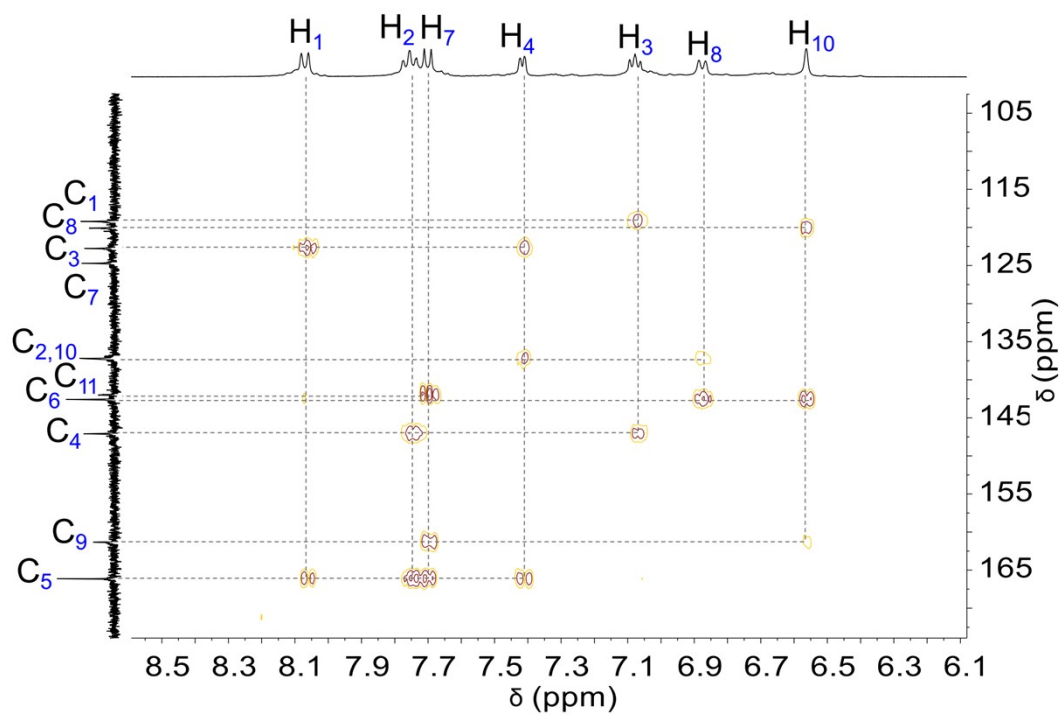

Fig. S17 Partial  $^1\text{H}$ - $^{13}\text{C}$  HMBC spectrum (400 MHz,  $\text{DMSO-}d_6$ , 298K) of  $\Delta_2R_6\text{-Ha}$ .

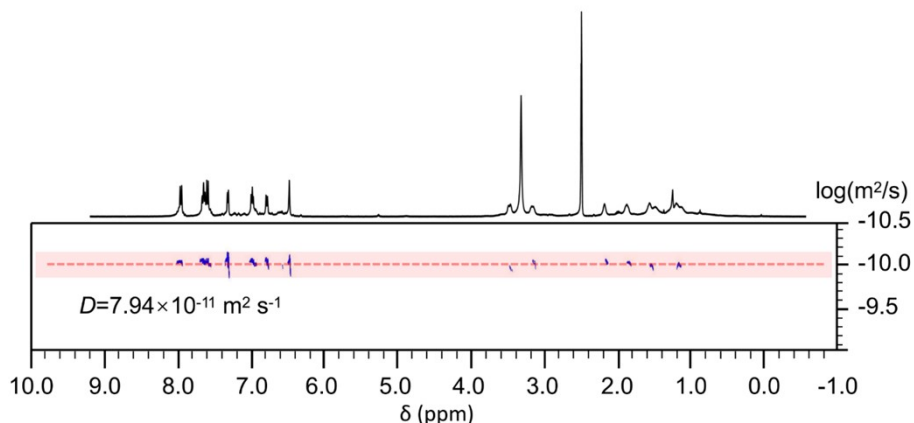

**Fig. S18**  $^1\text{H}$  DOSY NMR (400 MHz,  $\text{DMSO-}d_6$ , 298 K) spectrum of  $\Delta_2R_6\text{-Ha}$ .

#### 4.1.3 Synthesis of $\Delta_2R_6\text{-Hp}$

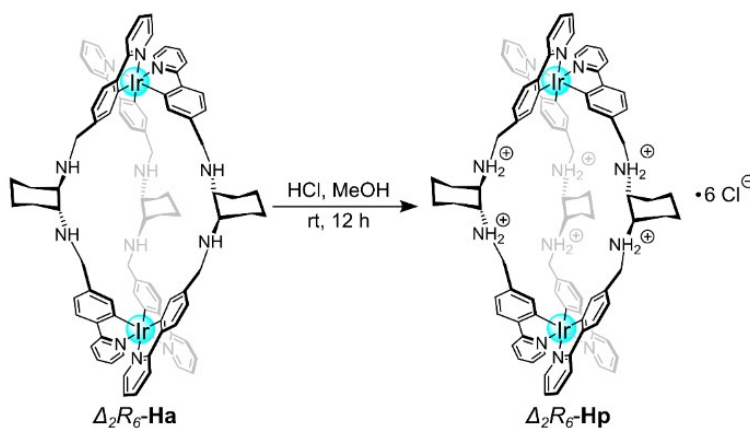

**Scheme S4** Synthesis route of  $\Delta_2R_6\text{-Hp}$ .

$\Delta_2R_6\text{-Ha}$  (35 mg, 0.020 mmol) was dissolved in methanol (30 mL), and HCl in ethanol (2 M, 1.8 mL) was added dropwise under vigorous stirring to adjust the pH to 2. The reaction mixture was stirred at room temperature for 12 h. After solvent evaporation, a yellowish-green solid of  $\Delta_2R_6\text{-Hp}$  was obtained in 98% yield (38 mg).

**HR-Q-TOF-MS:**  $m/z$   $[M - 4\text{H} - 6\text{Cl}]^{2+}$  calcd for  $[\text{C}_{90}\text{H}_{92}\text{Ir}_2\text{N}_{12}]^{2+}$ : 863.3415, found: 863.3424;  $[M - 3\text{H} - 6\text{Cl}]^{3+}$  calcd for  $[\text{C}_{90}\text{H}_{93}\text{Ir}_2\text{N}_{12}]^{3+}$ : 575.8968, found: 575.8970.

**$^1\text{H}$  NMR** (400 MHz,  $\text{D}_2\text{O}$ ):  $\delta$  8.22 (d,  $J = 7.7$  Hz, 1H,  $\text{H}_1$ ), 8.05 (d,  $J = 8.2$  Hz, 1H,  $\text{H}_7$ ), 7.85 (t,  $J = 7.9$  Hz, 1H,  $\text{H}_2$ ), 7.37 (d,  $J = 5.6$  Hz, 1H,  $\text{H}_4$ ), 7.19 (s, 1H,  $\text{H}_{10}$ ), 7.12 (d,  $J = 8.0$  Hz, 1H,  $\text{H}_8$ ), 7.05 (t,  $J = 13.0, 11.1$  Hz, 1H,  $\text{H}_3$ ), 3.62 (m, 1H,  $\text{H}_{12}$ ), 2.81 (d,  $J = 11.9$  Hz, 1H,  $\text{H}_{12'}$ ), 2.01 – 1.08 (m,  $J = 6.8$  Hz, 5H,  $\text{H}_{13}, \text{H}_{15}, \text{H}_{14}, \text{H}_{14}, \text{H}_{15}$ ).

**$^{13}\text{C}$  NMR** (101 MHz,  $\text{D}_2\text{O}$ ):  $\delta$  163.64 ( $\text{C}_5$ ), 160.21 ( $\text{C}_9$ ), 147.65 ( $\text{C}_4$ ), 146.41 ( $\text{C}_6$ ), 137.79 ( $\text{C}_2, \text{C}_{10}$ ), 125.06 ( $\text{C}_7$ ), 123.72 ( $\text{C}_3, \text{C}_8$ ), 119.75 ( $\text{C}_1$ ), 44.56 ( $\text{C}_{12}$ ), 35.09 ( $\text{C}_{13}$ ), 29.47 ( $\text{C}_{14}$ ), 23.10 ( $\text{C}_{15}$ ).

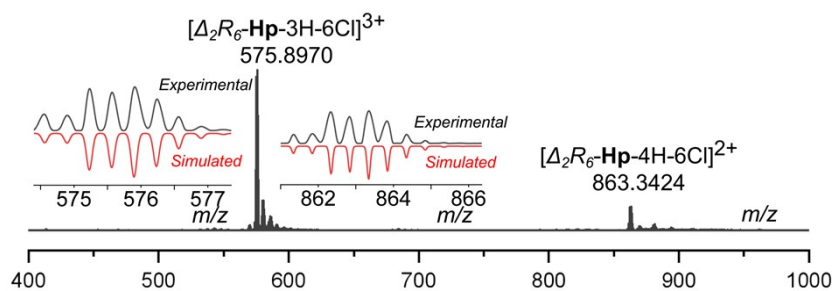

Fig. S19 HR-Q-TOF-MS spectrum of  $\Delta_2R_6$ -Hp.

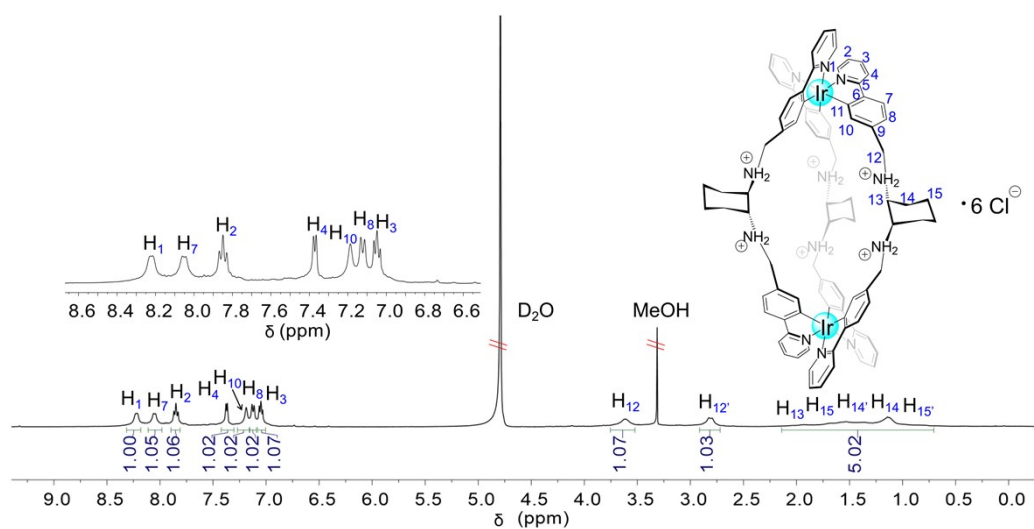

Fig. S20  $^1\text{H}$  NMR (400 MHz,  $\text{D}_2\text{O}$ , 298 K) spectrum of  $\Delta_2R_6$ -Hp.

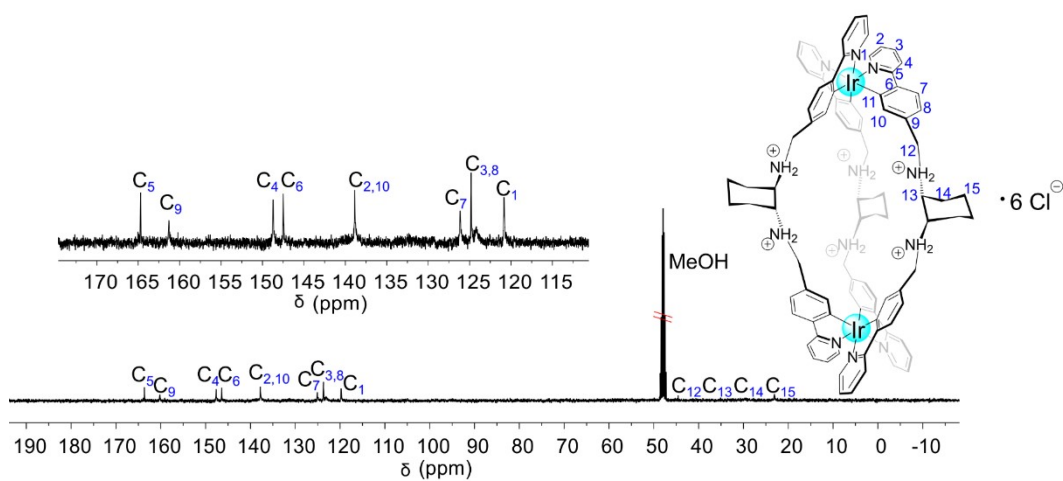

Fig. S21  $^{13}\text{C}$  NMR spectrum (101 MHz,  $\text{D}_2\text{O}$ , 298K) of  $\Delta_2R_6$ -Hp.

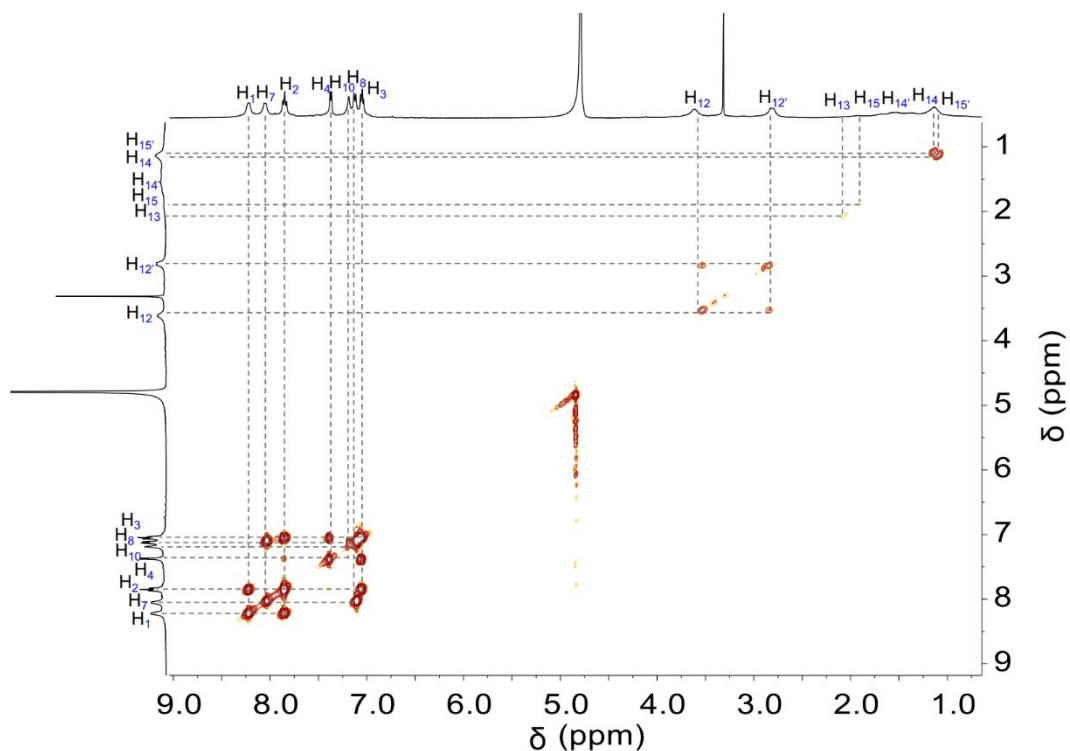

Fig. S22  $^1\text{H}$ - $^1\text{H}$  COSY spectrum (400 MHz,  $\text{D}_2\text{O}$ , 298K) of  $\Delta_2R_6\text{-Hp}$ .

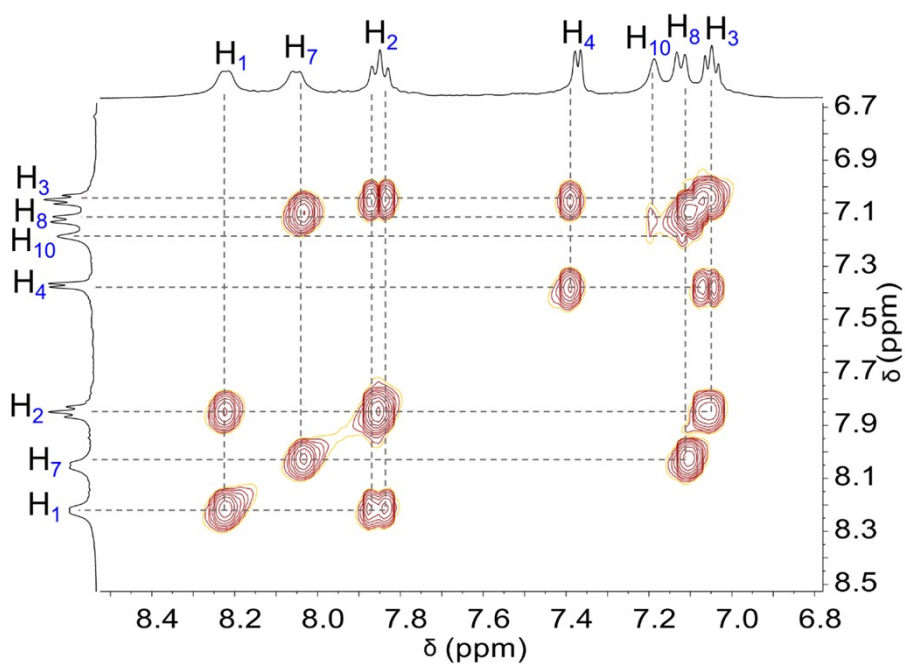

Fig. S23 Partial  $^1\text{H}$ - $^1\text{H}$  COSY spectrum (400 MHz,  $\text{D}_2\text{O}$ , 298K) of  $\Delta_2R_6\text{-Hp}$ .

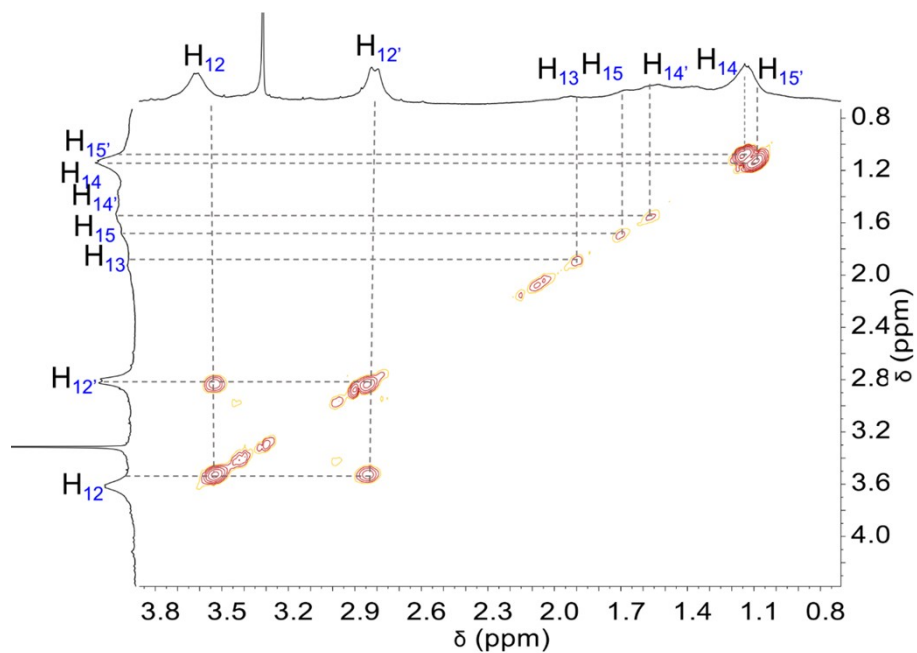

**Fig. S24** Partial  $^1\text{H}$ - $^1\text{H}$  COSY spectrum (400 MHz,  $\text{D}_2\text{O}$ , 298K) of  $\Delta_2R_6\text{-Hp}$ .

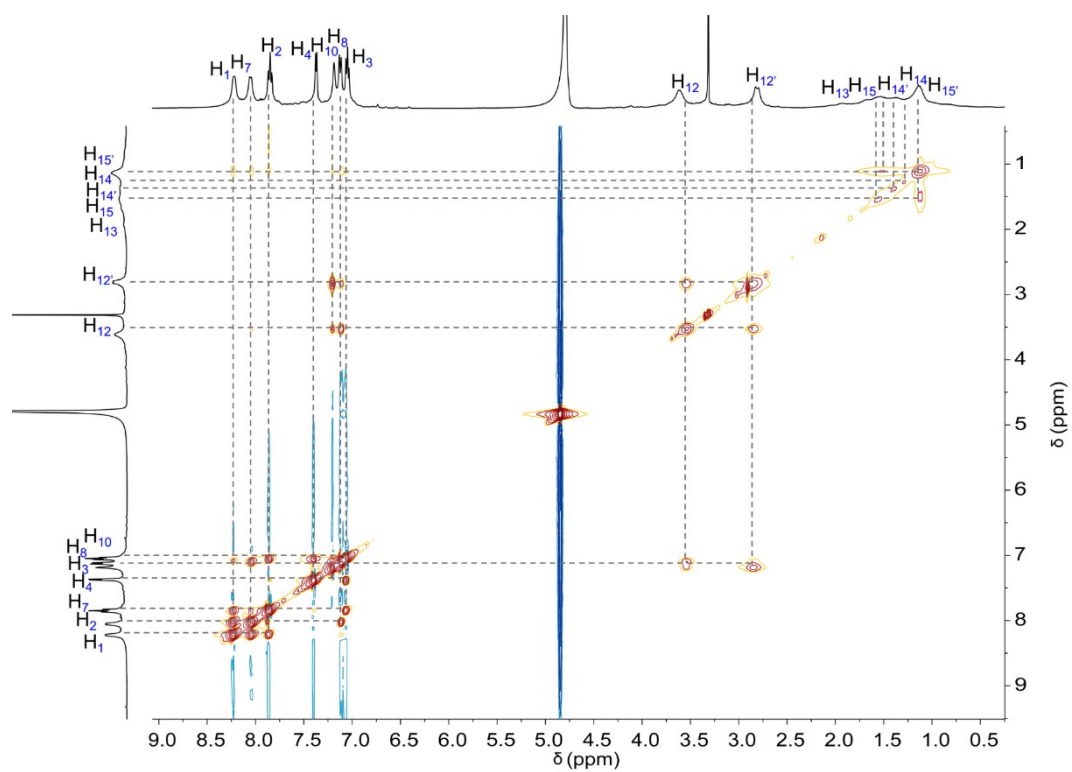

**Fig. S25**  $^1\text{H}$ - $^1\text{H}$  NOESY spectrum (400 MHz,  $\text{D}_2\text{O}$ , 298K) of  $\Delta_2R_6\text{-Hp}$ .

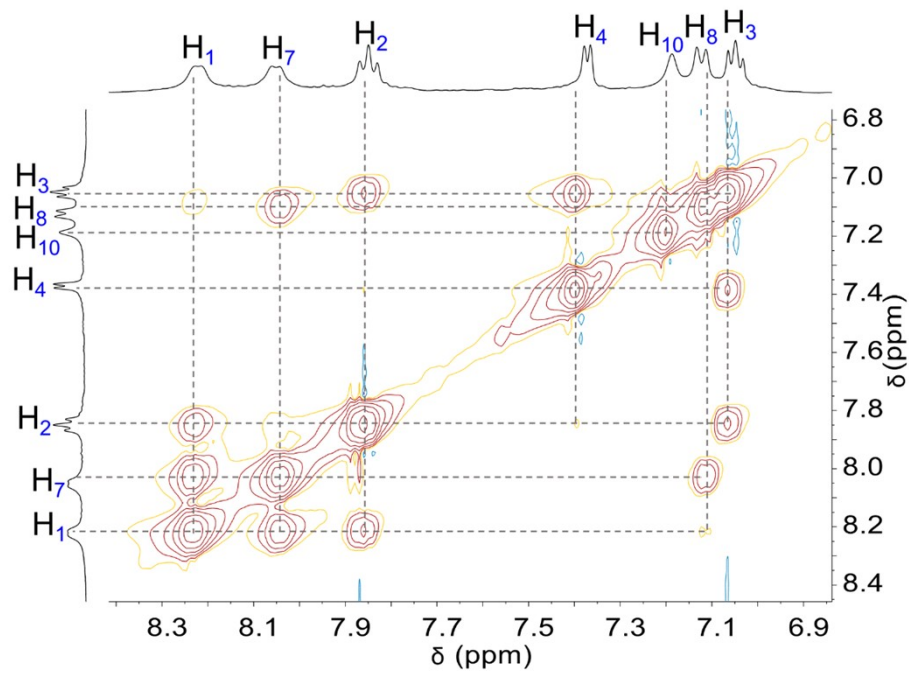

**Fig. S26** Partial  $^1\text{H}$ - $^1\text{H}$  NOESY spectrum (400 MHz,  $\text{D}_2\text{O}$ , 298K) of  $\Delta_2R_6\text{-Hp}$ .

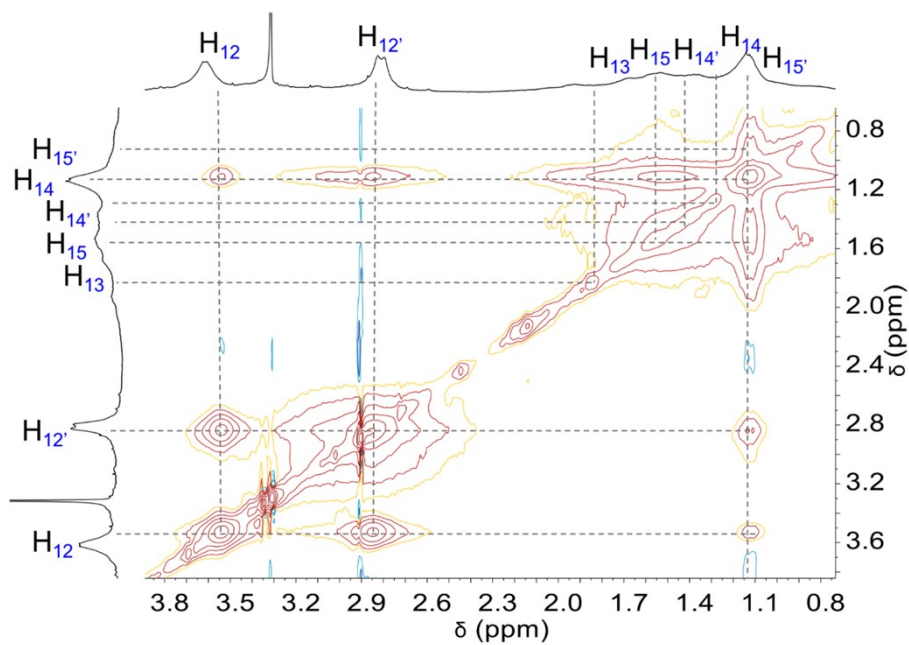

**Fig. S27** Partial  $^1\text{H}$ - $^1\text{H}$  NOESY spectrum (400 MHz,  $\text{D}_2\text{O}$ , 298K) of  $\Delta_2R_6\text{-Hp}$ .

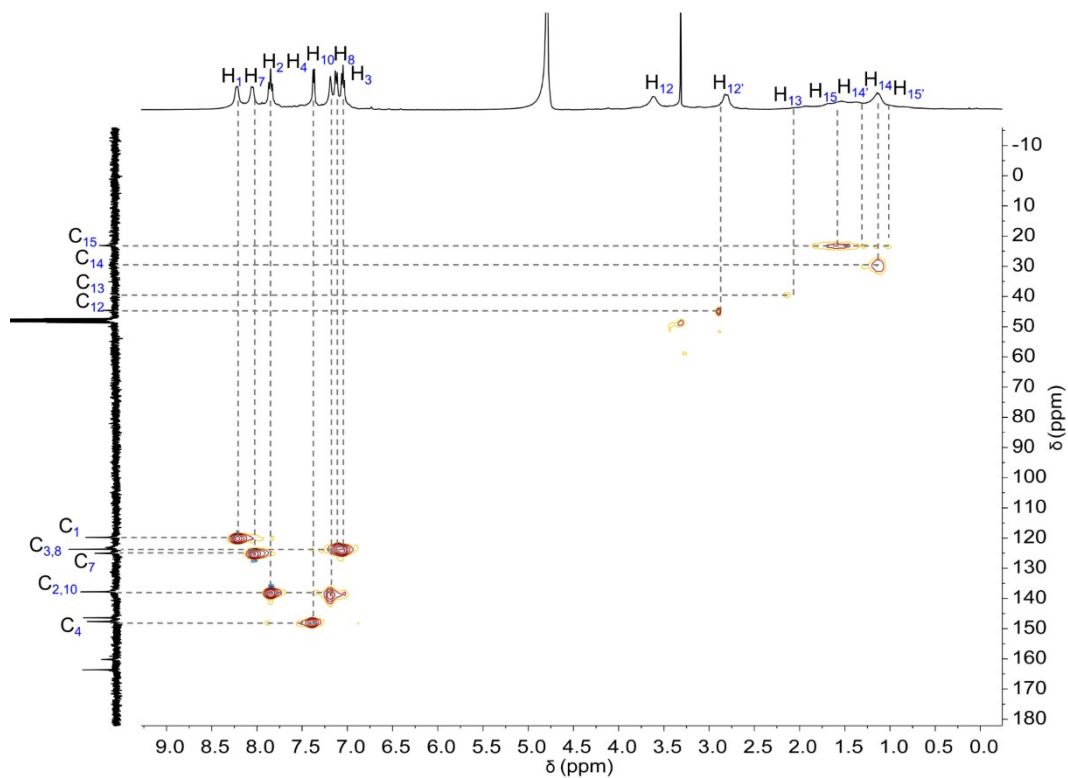

Fig. S28  $^1\text{H}$ - $^{13}\text{C}$  HSQC spectrum (400 MHz,  $\text{D}_2\text{O}$ , 298K) of  $\Delta_2R_6\text{-Hp}$ .

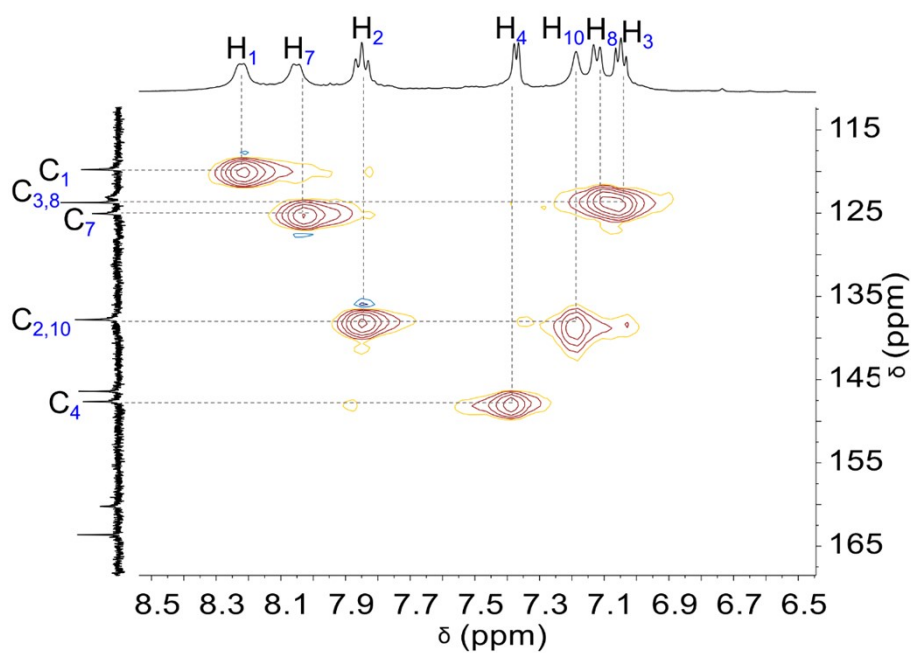

Fig. S29 Partial  $^1\text{H}$ - $^{13}\text{C}$  HSQC spectrum (400 MHz,  $\text{D}_2\text{O}$ , 298K) of  $\Delta_2R_6\text{-Hp}$ .

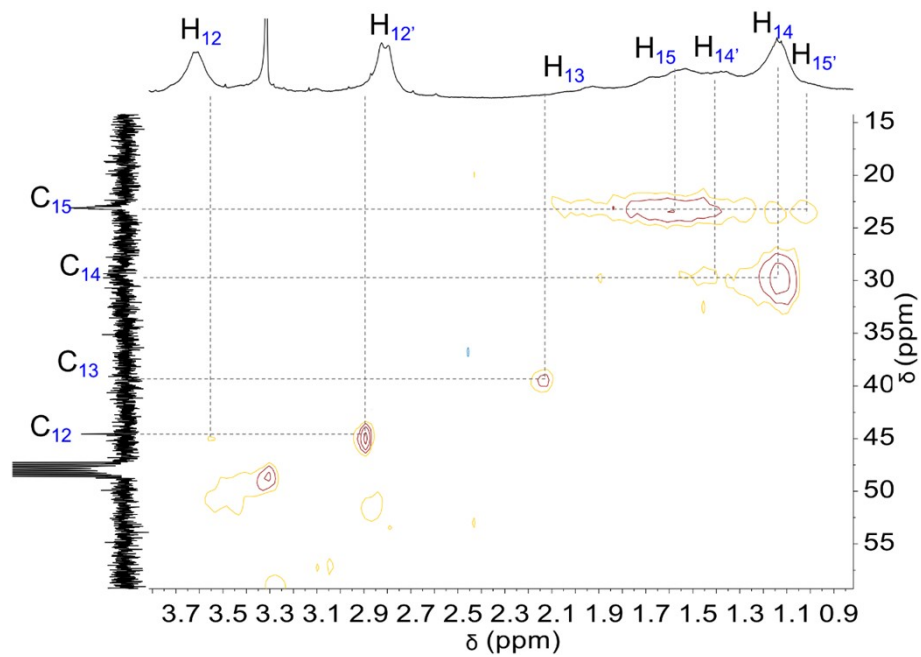

Fig. S30 Partial  $^1\text{H}$ - $^{13}\text{C}$  HSQC spectrum (400 MHz,  $\text{D}_2\text{O}$ , 298K) of  $A_2R_6\text{-Hp}$ .

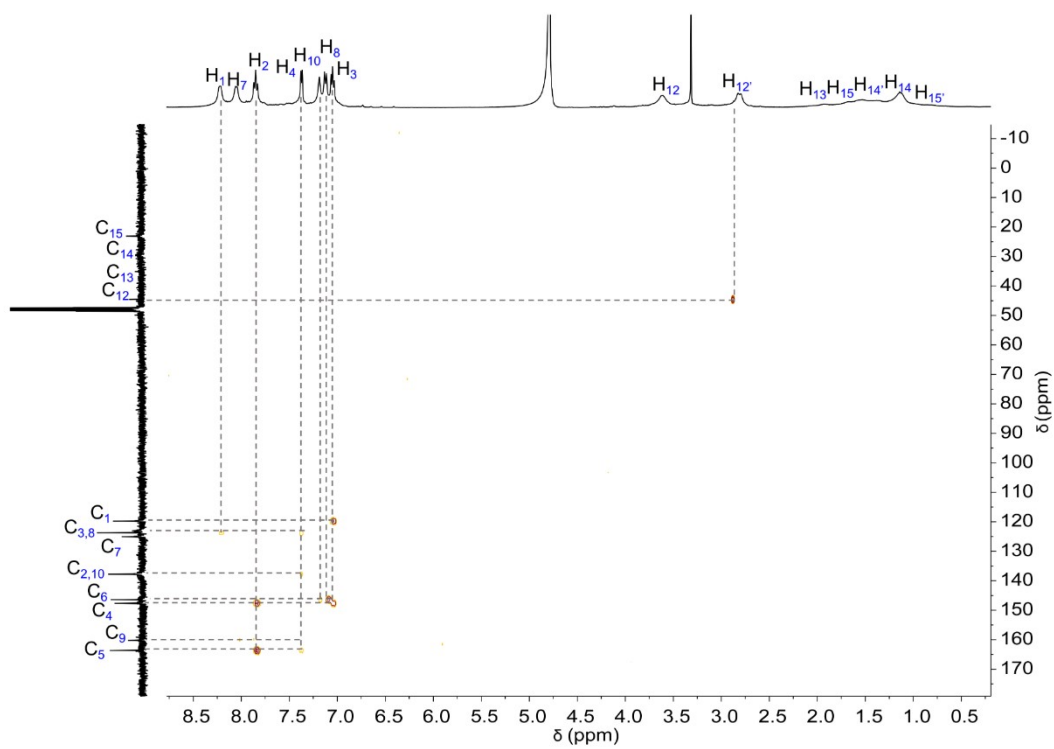

Fig. S31  $^1\text{H}$ - $^{13}\text{C}$  HMBC spectrum (400 MHz,  $\text{D}_2\text{O}$ , 298K) of  $A_2R_6\text{-Hp}$ .

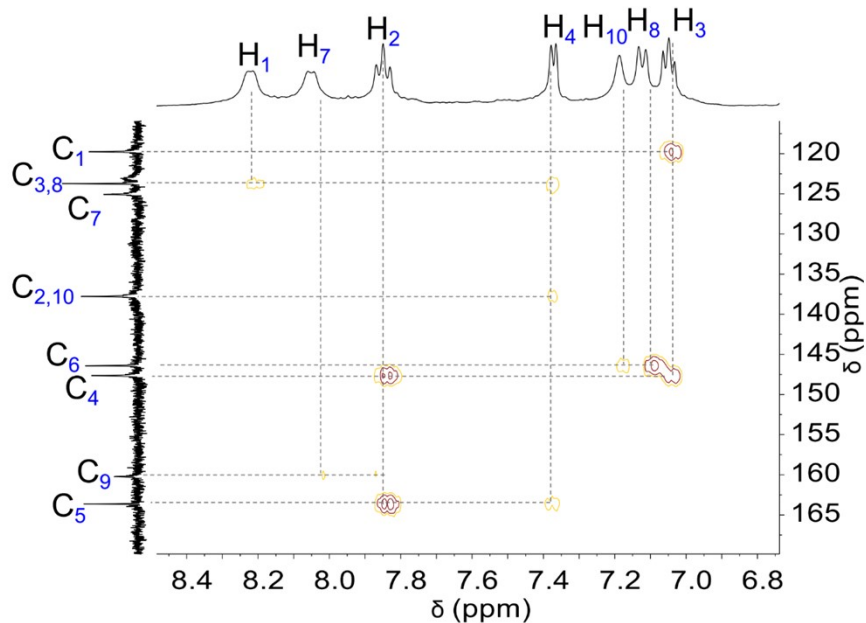

**Fig. S32** Partial  $^1\text{H}$ - $^{13}\text{C}$  HMBC spectrum (400 MHz,  $\text{D}_2\text{O}$ , 298K) of  $\Delta_2R_6\text{-Hp}$ .

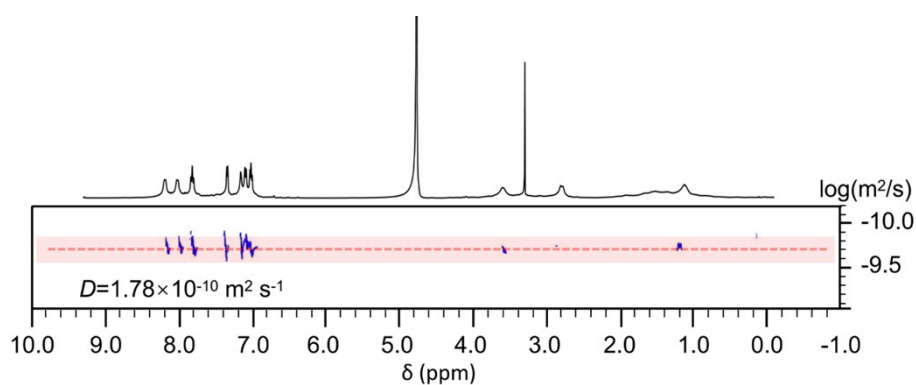

**Fig. S33**  $^1\text{H}$  DOSY NMR (400 MHz,  $\text{D}_2\text{O}$ , 298K) of  $\Delta_2R_6\text{-Hp}$ .

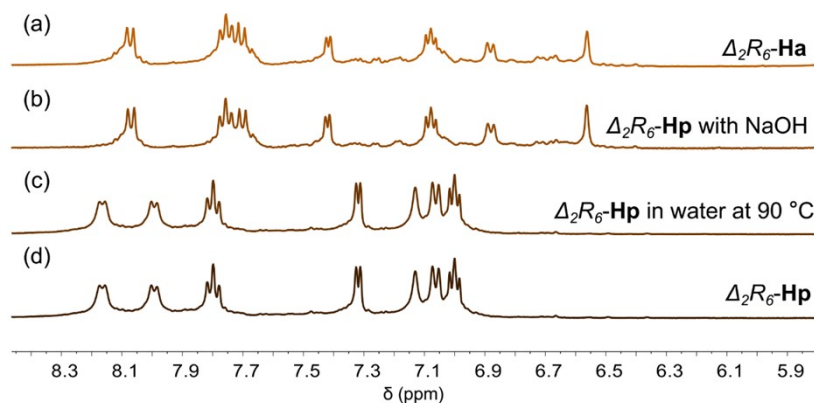

**Fig. S34** (a) Partial  $^1\text{H}$  NMR spectrum (400 MHz,  $\text{DMSO-}d_6$ ) of  $\Delta_2R_6\text{-Ha}$ . (b) Partial  $^1\text{H}$  NMR spectrum (400 MHz,  $\text{DMSO-}d_6$ ) of  $\Delta_2R_6\text{-Hp}$  with NaOH. (c) Partial  $^1\text{H}$  NMR spectrum (400 MHz,  $\text{D}_2\text{O}$ ) of  $\Delta_2R_6\text{-Hp}$  in 90 °C hot water for 48 h. (d) Partial  $^1\text{H}$  NMR spectrum (400 MHz,  $\text{D}_2\text{O}$ ) of  $\Delta_2R_6\text{-Hp}$ .

## 4.2 Synthesis and characterization of $\Lambda_2S_6$ -Hp

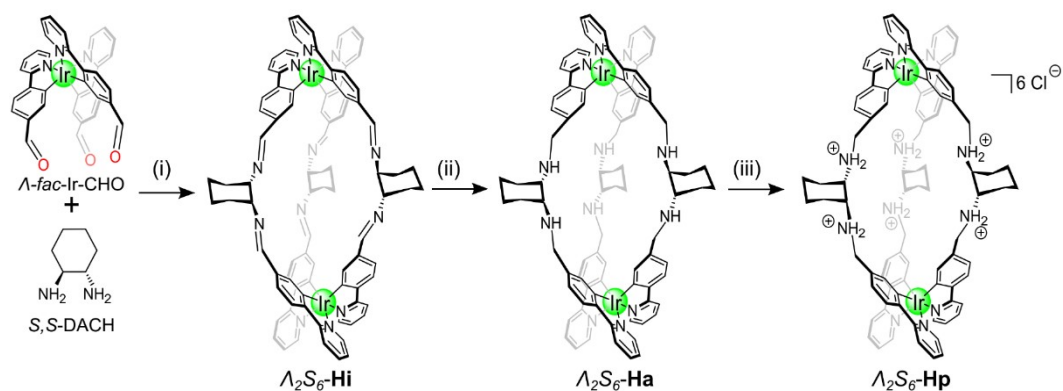

**Scheme S5** Synthesis of enantiomeric  $\Lambda_2S_6$ -Hp. Reaction conditions: (i) p-Toluenesulfonic acid (TsOH),  $\text{CH}_3\text{CN}$ , Toluene, 110 °C, 12 h, 90% in total; (ii)  $\text{NaBH}_4$ , MeOH,  $\text{CH}_2\text{Cl}_2$ , rt, 12 h, 93%; (iii) HCl 0.1 M, MeOH, room temperature, 98%.

$\Lambda_2S_6$ -Hp was successfully synthesized following the process of  $\Lambda_2R_6$ -Hp, through the substitution of the chiral modules with their corresponding enantiomers, in detail,  $\Lambda$ -fac-Ir-CHO was replaced by  $\Lambda$ -fac-Ir-CHO and *R,R*-DACH by *S,S*-DACH.

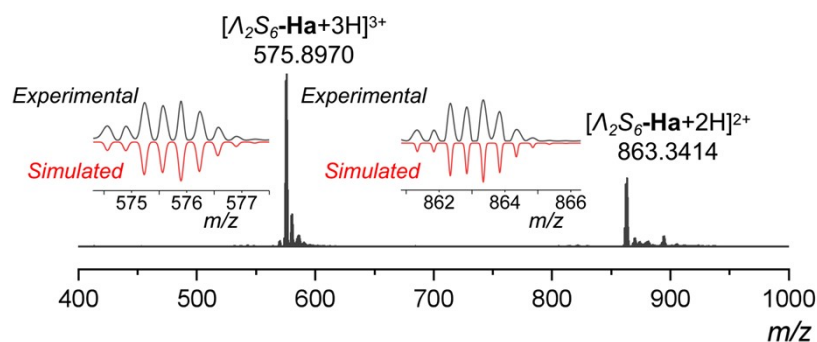

**Fig. S35** HR-Q-TOF-MS spectrum of  $\Lambda_2S_6$ -Ha.

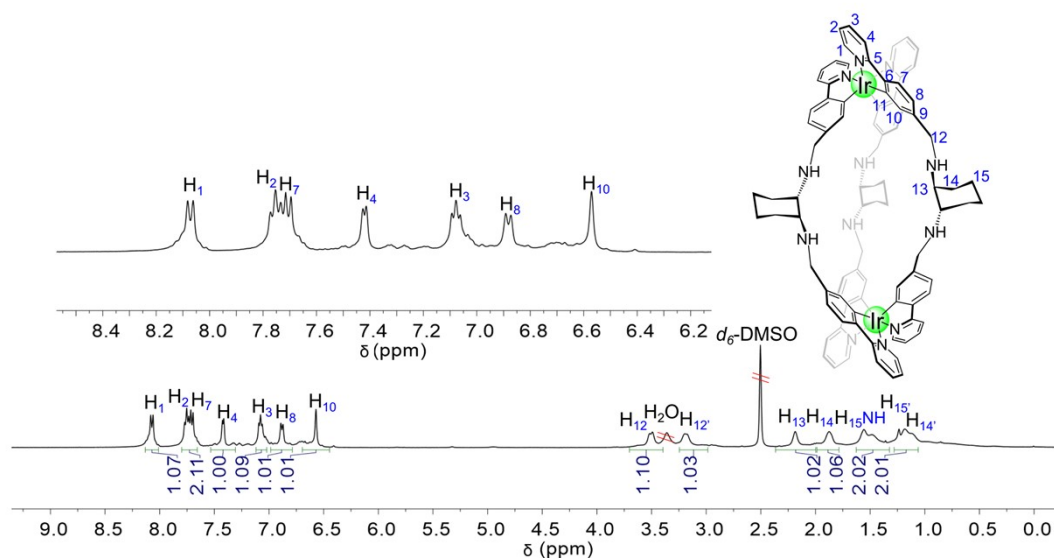

**Fig. S36**  $^1\text{H}$  NMR (400 MHz,  $\text{DMSO-}d_6$ , 298 K) spectrum of  $\Lambda_2S_6$ -Ha.

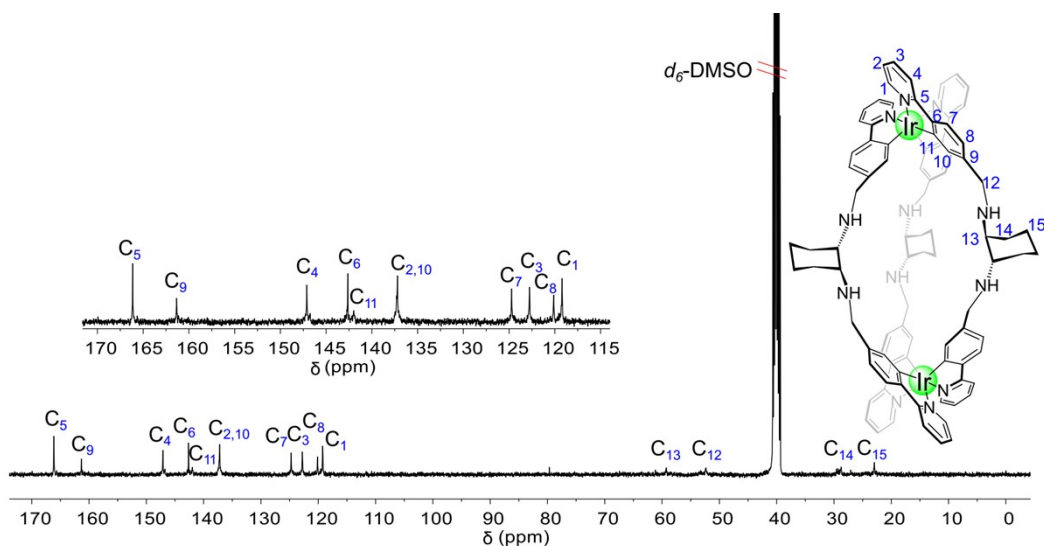

**Fig. S37**  $^{13}\text{C}$  NMR spectra (101 MHz,  $\text{DMSO-}d_6$ , 298K) of  $A_2S_6\text{-Ha}$ .

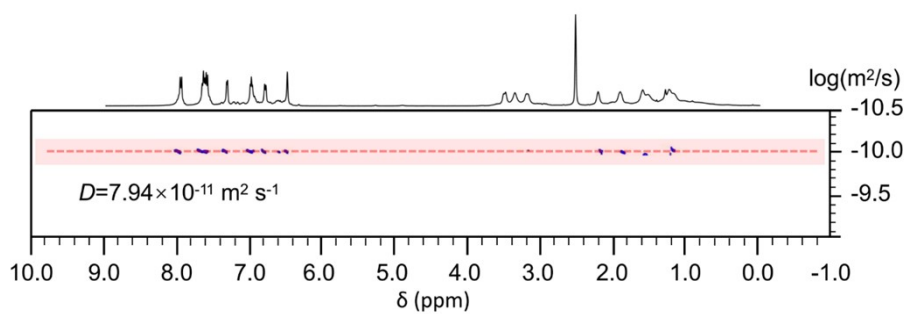

**Fig. S38**  $^1\text{H}$  DOSY NMR (400 MHz,  $\text{DMSO-}d_6$ , 295 K) spectrum of  $A_2S_6\text{-Ha}$ .

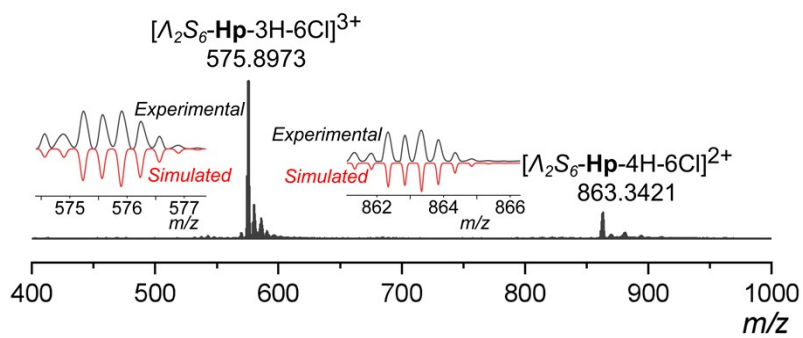

**Fig. S39** HR-Q-TOF-MS spectrum of  $A_2S_6\text{-Hp}$ .

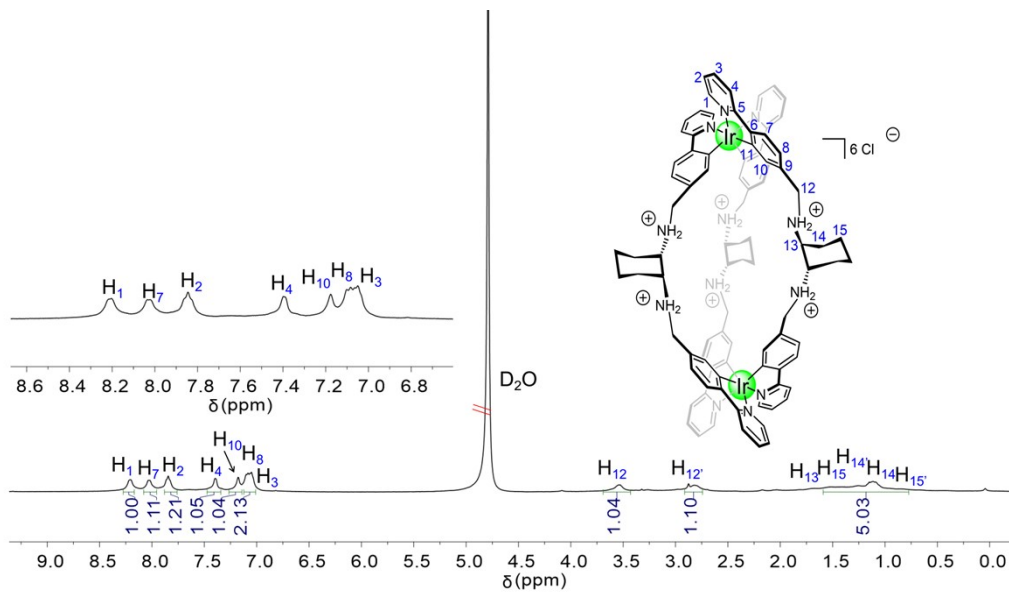

Fig. S40  $^1\text{H}$  NMR (400 MHz,  $\text{D}_2\text{O}$ , 298 K) spectrum of  $A_2S_6\text{-Hp}$ .

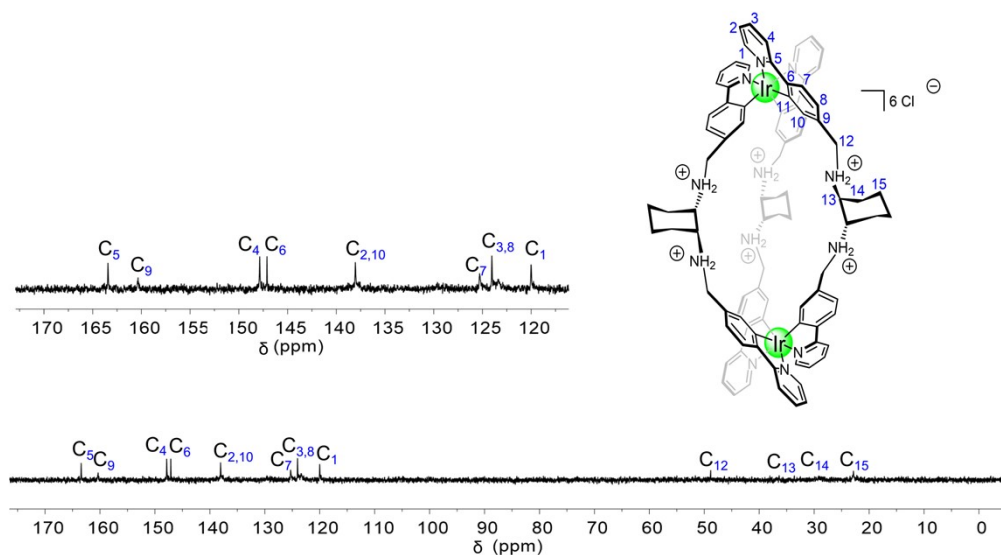

Fig. S41  $^{13}\text{C}$  NMR spectra (101 MHz,  $\text{D}_2\text{O}$ , 298 K) of  $A_2S_6\text{-Hp}$ .

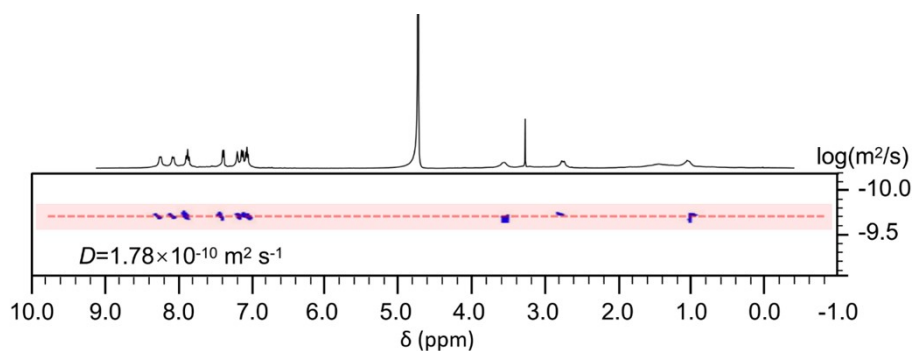

Fig. S42  $^1\text{H}$  DOSY NMR (400 MHz,  $\text{D}_2\text{O}$ , 298 K) of  $A_2S_6\text{-Hp}$ .

### 4.3 CD and CPL characterization

**Note:** In DMSO solution, all enantiopure cages exhibited mirror-image circular dichroism (CD) and circularly polarized luminescence (CPL) spectra with robust Cotton effects, closely resembling those of the initial mononuclear  $\Delta/\Lambda$ -*fac*-Ir-CHO modules. <sup>[S12]</sup> The highly symmetrical and similar CD and CPL curves suggest that the pseudo-octahedral iridium stereochemistry of the starting  $\Delta/\Lambda$ -*fac*-Ir-CHO modules was well preserved during the assembly process, dominating the chirality of these enantiopure cages. These are confirmed that the chiral enantiomeric cages were successfully synthesized.

Quite interesting observations were made when characterizing the homochiral cages using CD and CPL spectroscopies. All homochiral cages resulted in chirality amplification, while the  $\Delta/\Lambda$ -*fac*-Ir-CHO modules presented weaker signals in comparison. As shown in Fig. S43a,  $\Delta_2R_6/\Lambda_2S_6$ -**Ha** presented more pronounced CD bands in the region of 300–340 nm, which was 2.6 times of the  $\Delta/\Lambda$ -*fac*-Ir-CHO modules. Such drastic enhancement might be attributed to the transfer of stereogenic information from the rigid C=N bonds of DACH ligands as well as the twisted structure. Moreover, the global transfer of chiral information throughout the whole skeleton, these cages presented prominent CPL with dissymmetric factor  $g_{lum}$  of  $\pm 0.0016\sim 0.0020$  at 520–540 nm (Fig. S43b).

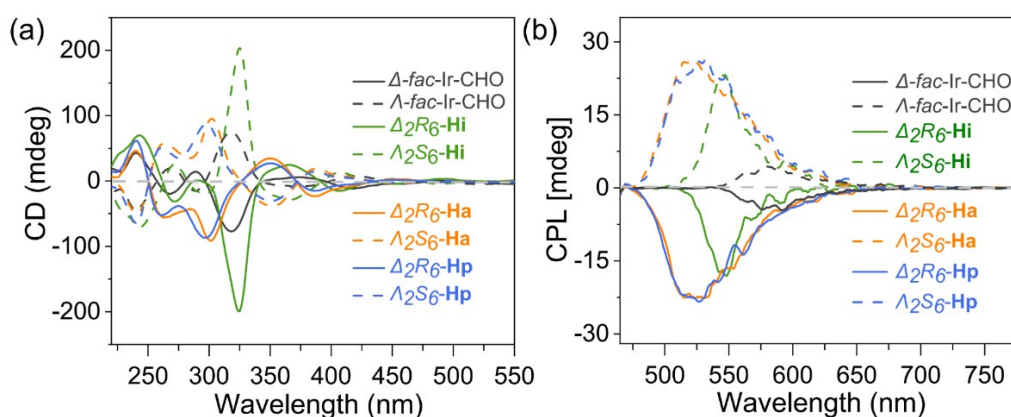

**Fig. S43** CD and CPL spectra of chiral assembly modules and all enantiopure cages.

### 4.4 Synthesis and characterization of Au@ $\Delta_2R_6$ -Hp

In detail,  $\Delta_2R_6$ -**Hp** (12 mg, 0.006 mmol) was dissolved in deionized water (30 mL), followed by the addition of an aqueous HAuCl<sub>4</sub> solution (0.1 mL, 0.006 mmol) under an argon atmosphere with gentle stirring in the dark. The resulting mixture was stirred for 1 h to allow equilibration. During this period, the initially yellow solution exhibited minimal color change, suggesting that the AuCl<sub>4</sub><sup>-</sup> ions were likely encapsulated within the cavity of  $\Delta_2R_6$ -**Hp**, driven by strong electrostatic interactions. Subsequent addition of NaOH (0.1 M, 0.6 mL) led to the formation of a yellow precipitate, corresponding to the neutral complex AuCl<sub>4</sub><sup>-</sup>@ $\Delta_2R_6$ -**Ha**. The solid was isolated by centrifugation and washed twice with water to remove unbound AuCl<sub>4</sub><sup>-</sup>.

The resulting AuCl<sub>4</sub><sup>-</sup>@ $\Delta_2R_6$ -**Ha** powder was then treated with HCl (0.1 M, 0.6 mL) to protonate the host. Immediately thereafter, an aqueous NaBH<sub>4</sub> solution (5 mL, 0.012 mmol) was added

dropwise under vigorous stirring, affording a brown solution indicative of gold nanoparticle formation. This was followed by the addition of HCl (0.1 M) to adjust the pH to 2 under continued stirring. Finally, the mixture was freeze-dried to yield Au@ $\Delta_2R_6$ -**Hp** as a dark yellowish-green powder. The gold content of was determined to be 25.9 wt% by inductively coupled plasma optical emission spectrometry (ICP-OES).

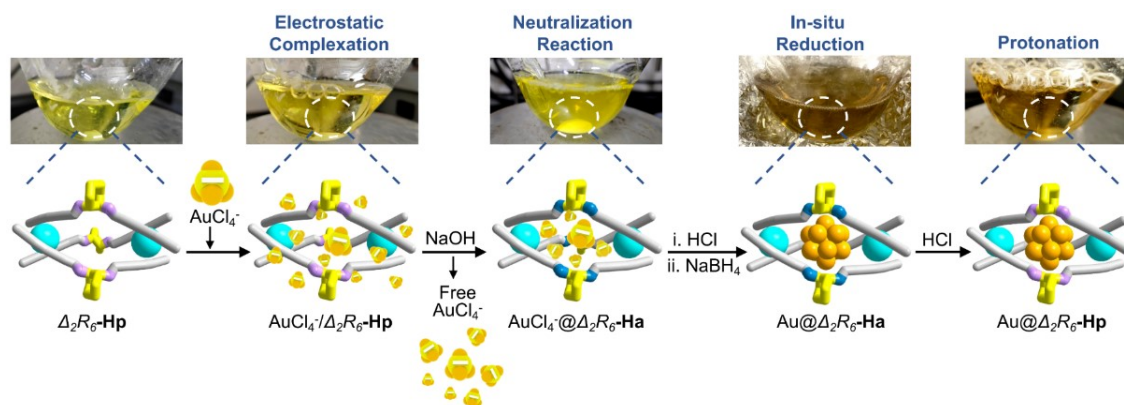

**Scheme S6** the five-step strategy for synthesis of Au@ $\Delta_2R_6$ -**Hp** involving Electrostatic complexation encapsulates AuCl<sub>4</sub><sup>-</sup> inclusion into the  $\Delta_2R_6$ -**Hp** cavity, base treatment isolates the precipitate of Au@ $\Delta_2R_6$ -**Ha** to remove un-encapsulated AuCl<sub>4</sub><sup>-</sup>, and protonation the precipitate of AuCl<sub>4</sub><sup>-</sup>@ $\Delta_2R_6$ -**Ha** and re-dissolves in water, and in-situ NaBH<sub>4</sub> reduction with AuCl<sub>4</sub><sup>-</sup>@ $\Delta_2R_6$ -**Hp**, and followed by protonation of Au@ $\Delta_2R_6$ -**Ha** to yield the final Au@ $\Delta_2R_6$ -**Hp** product.

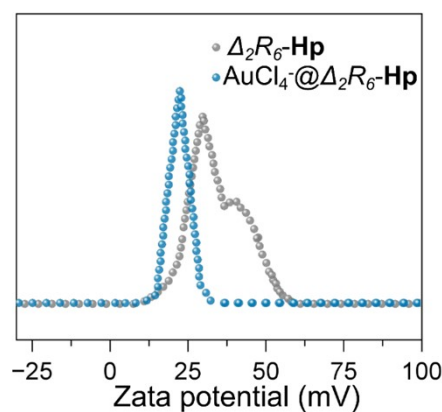

**Fig. S44** Zeta potential curves of  $\Delta_2R_6$ -**Hp** (gray) and AuCl<sub>4</sub><sup>-</sup>@ $\Delta_2R_6$ -**Hp** (blue).

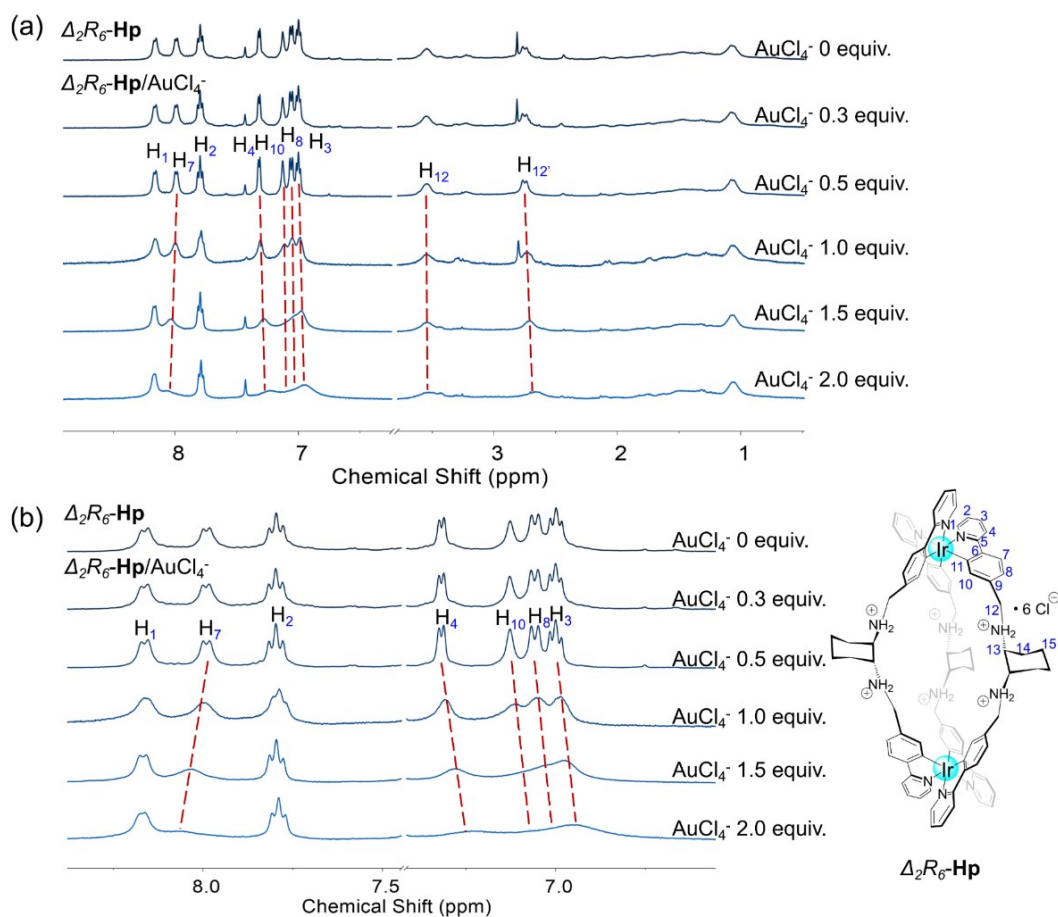

**Fig. S45** (a) the  $^1\text{H}$  NMR spectra to monitor the proton peaks shift to reveal the interaction between  $\text{AuCl}_4^-$  anions and  $\Delta_2R_6\text{-Hp}$ . (b) Enlarged areas for aromatic region peaks that clearly show the shifts migration.

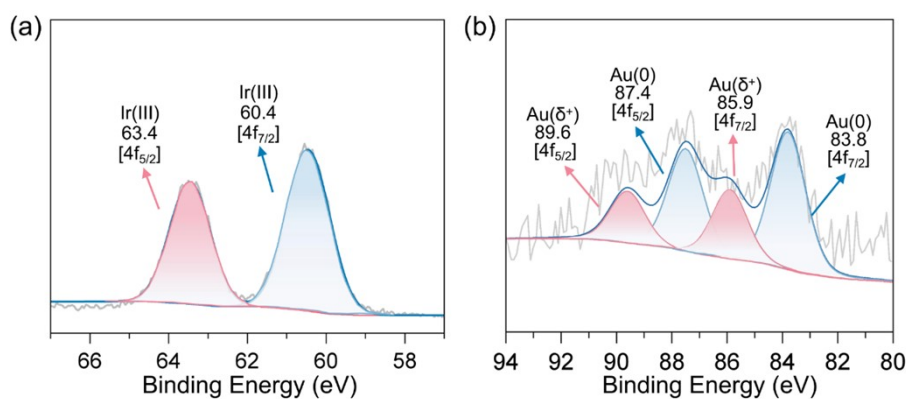

**Fig. S46** (a) XPS spectrum of Ir 4f in  $\text{Au}@_2R_6\text{-Hp}$ , showing the presence of Ir (III) at 60.4 eV for 4f<sub>7/2</sub> and 63.4 eV for 4f<sub>5/2</sub>, respectively. (b) XPS spectrum of Au(0) 4f in  $\text{Au}@_2R_6\text{-Hp}$ , showing the presence of Au(0) at 83.8 eV for 4f<sub>7/2</sub> and 87.4 eV for 4f<sub>5/2</sub>, respectively; and the oxidative state of the Au(δ<sup>+</sup>) 4f in  $\text{Au}@_2R_6\text{-Hp}$ , showing the presence of Au(δ<sup>+</sup>) at 85.9 eV for 4f<sub>7/2</sub> and 89.6 eV for 4f<sub>5/2</sub>, respectively.

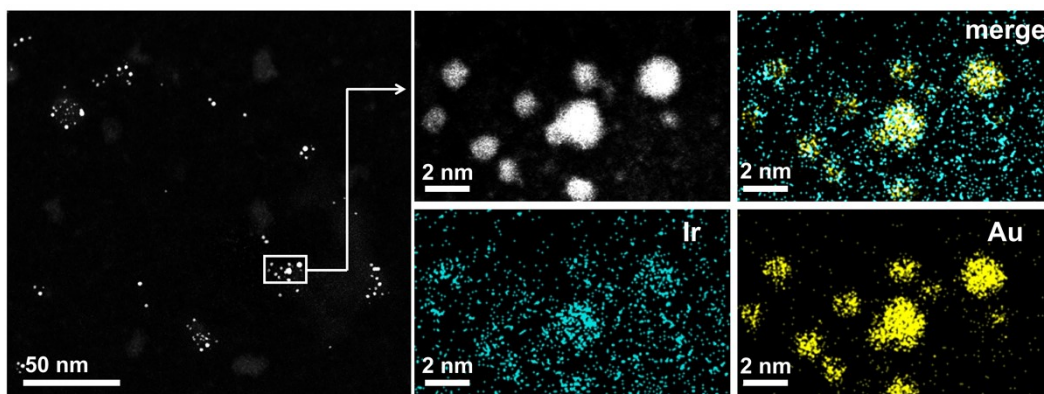

**Fig. S47** HAADF-STEM image and corresponding EDS elemental mapping of Ir and Au for the  $\text{Au}@_{\Delta_2R_6}\text{-Hp}$ .

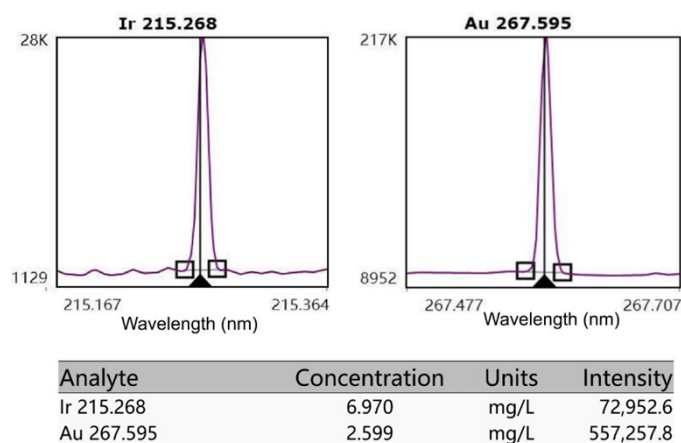

**Fig. S48** Inductively coupled plasma optical emission spectrometry (ICP-OES) of  $\text{Au}@_{\Delta_2R_6}\text{-Hp}$ . A gold loading of 25.9 wt% suggests incomplete occupancy of the protonated cages.

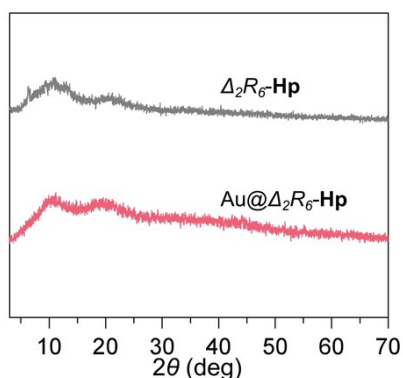

**Fig. S49** PXRD patterns of  $\Delta_2R_6\text{-Hp}$  (gray) and  $\text{Au}@_{\Delta_2R_6}\text{-Hp}$  (pink).

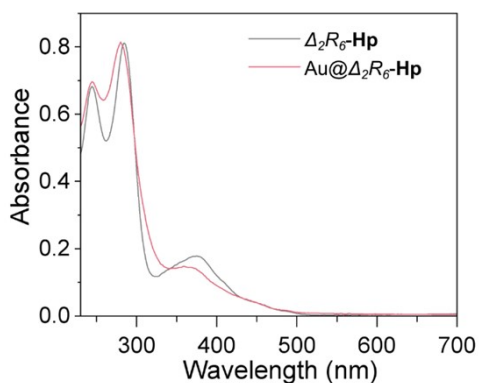

**Fig. S50** UV-vis spectra of complexes  $\Delta_2R_6\text{-Hp}$  and  $\text{Au}@_{\Delta_2R_6}\text{-Hp}$  in DMSO (10  $\mu\text{M}$ ).

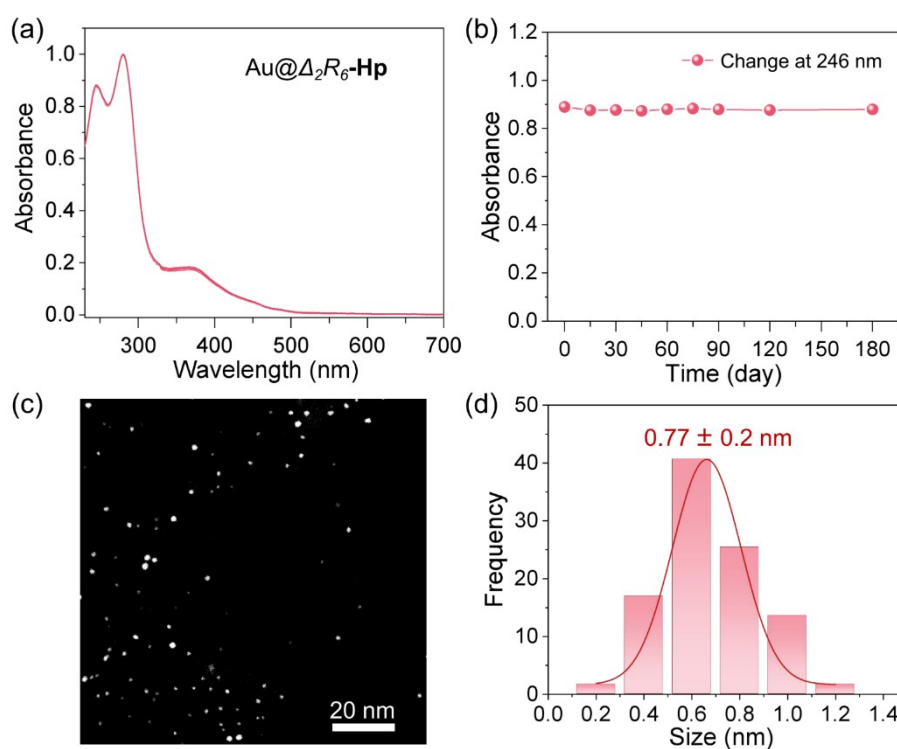

**Fig. S51** (a) Evolution of the UV-vis spectra of  $\text{Au}@_{\Delta_2R_6}\text{-Hp}$  stored in the refrigerator at  $-4\text{ }^{\circ}\text{C}$  in water for 180 days; (b) Time-dependent corresponding absorption of  $\text{Au}@_{\Delta_2R_6}\text{-Hp}$  at 246 nm. (c) HAADF-STEM image of  $\text{Au}@_{\Delta_2R_6}\text{-Hp}$  after 180 days. (d) HAADF-STEM images at scale bar of 20 nm corresponding statistical size distribution histogram of encapsulated Au clusters in  $\Delta_2R_6\text{-Hp}$  after 180 days.

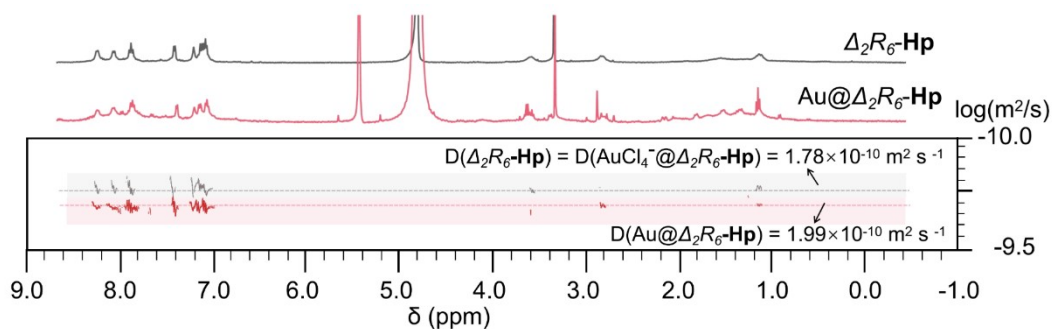

**Fig. S52**  $^1\text{H}$  NMR and DOSY spectra of  $\Delta_2R_6\text{-Hp}$  (gray),  $\text{AuCl}_4^-@_2R_6\text{-Hp}$  (blue) and  $\text{Au}@_2R_6\text{-Hp}$  (pink).

#### 4.5 Synthesis and characterization of $\text{Au}@_2S_6\text{-Hp}$

The  $_2S_6\text{-Hp}$  is also an ideal scaffold for the encapsulation and stabilization of Au-NCs. We successfully obtained  $\text{Au}@_2S_6\text{-Hp}$  though the same process as  $\text{Au}@_2R_6\text{-Hp}$ . The Au-NCs in  $_2S_6\text{-Hp}$  are uniformly distributed and have homogeneous sizes, estimated to be  $0.73 \pm 0.18$  nm.

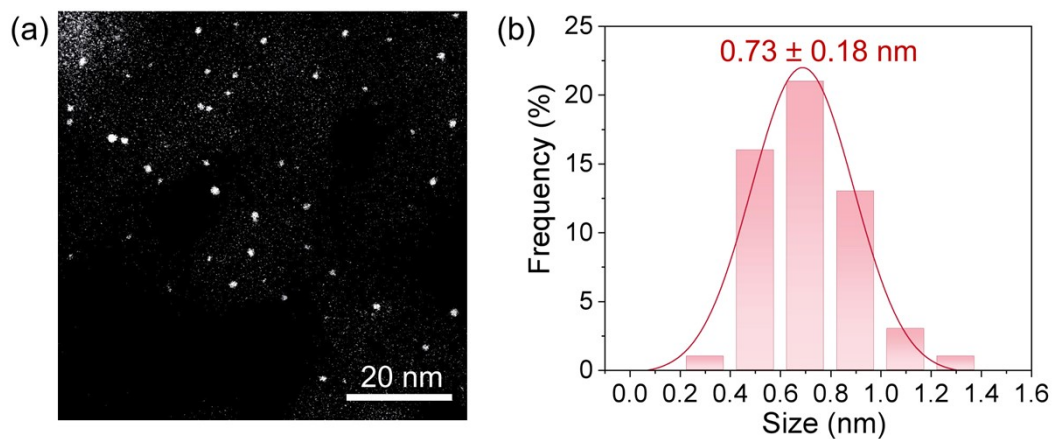

**Fig. S53** (a, b) Spherical aberration HAADF-STEM images of  $\text{Au}@_2S_6\text{-Hp}$ . (c) the corresponding size distribution histogram of Au clusters in  $_2S_6\text{-Hp}$ .

#### 4.6 Synthesis and characterization of Au/ $\Delta_2R_6$ -Ha

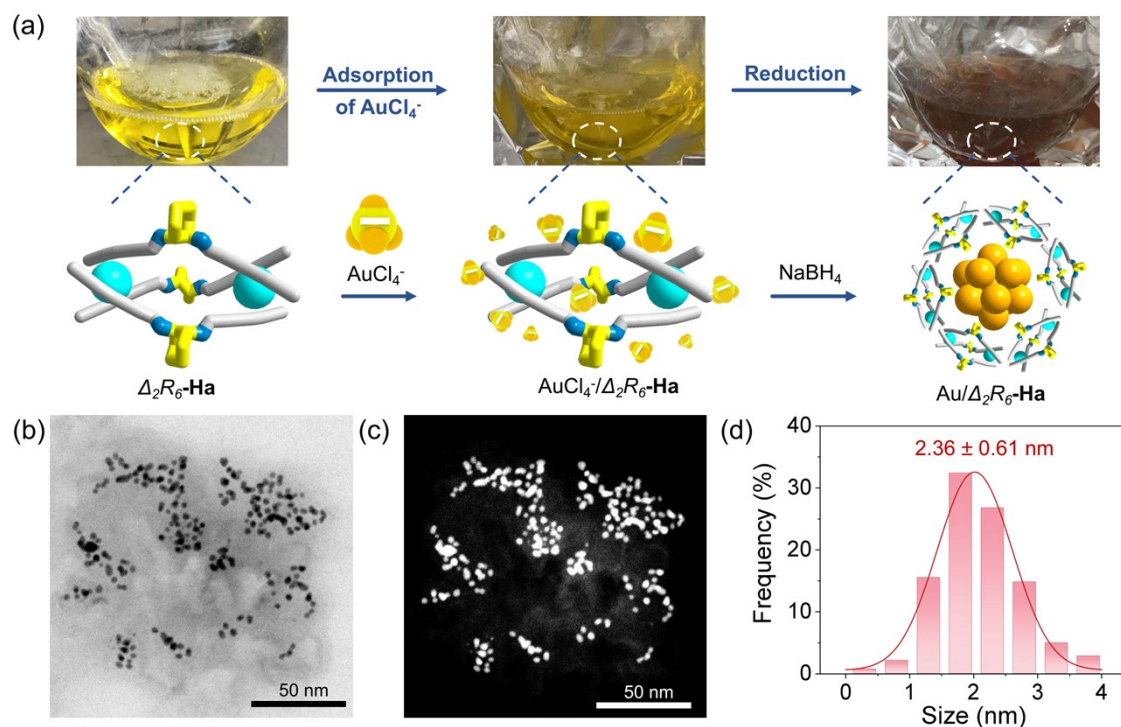

**Fig. S54** (a) the synthesis of Au/ $\Delta_2R_6$ -Ha involving (1) Adsorption of  $\text{AuCl}_4^-$  onto the  $\Delta_2R_6$ -Ha, (2) In-situ  $\text{NaBH}_4$  reduction with  $\text{AuCl}_4^-/\Delta_2R_6$ -Ha. (b) STEM images and (c) HAADF-STEM images of Au/ $\Delta_2R_6$ -Ha. (d) The corresponding size distribution histogram of Au nanoparticles immobilized on  $\Delta_2R_6$ -Ha, scale bar: 50 nm.

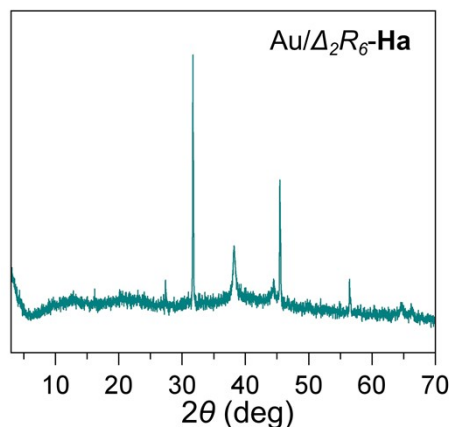

**Fig. S55** PXRD patterns of Au/ $\Delta_2R_6$ -Ha.

The synthesis of gold nanoparticles ( $2.36 \pm 0.61$  nm) using the reduced cage compound  $\Delta_2R_6$ -Ha as a template carrier through the similar methodology (Fig. S54).  $\Delta_2R_6$ -Ha (12 mg, 0.006 mmol) was dissolved in methanol (5 mL), dispersed in water (30 mL), subsequently added to 0.1 mL (0.006 mmol) of aqueous  $\text{HAuCl}_4$  solution (21.5 mg in 1 mL water), dark stirring in Ar atmosphere. The yellow solution gradually deepened in color, and then 5 mL of aqueous solution containing  $\text{NaBH}_4$

(4.6 mg, 0.012 mmol, 20 equiv.) was immediately added dropwise with vigorous shaking, resulting in a brown solution. Afterward, the methanol was evaporated at room temperature, and the product was freeze-dried to yield Au/ $\Delta_2R_6$ -**Ha** as a dark brown powder. The PXRD pattern of Au/ $\Delta_2R_6$ -**Ha** shows multiple diffraction peaks in the 30-70° range, consistent with the presence of crystalline Au nanoparticles (Fig. S55). The size difference occurs because  $\Delta_2R_6$ -**Ha** loses the capacity to trap metal anion precursors through strong electrostatic attraction, unlike its protonated counterpart. These complementary datasets provide robust evidence for the maintained nanoparticle retention and dispersion stability.

## Section 5. Evaluation of Catalytic Performance

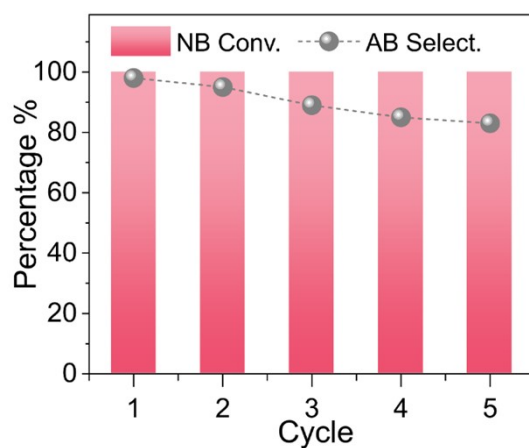

**Fig. S56** Recycle experiments of Au@ $\Delta_2R_6$ -Hp, each cycle was conducted for 24 h.

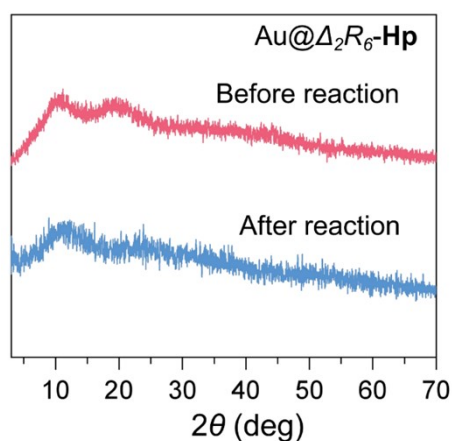

**Fig. S57** PXRD pattern of the freshly prepared Au@ $\Delta_2R_6$ -Hp (pink line) and after catalytic cycles (blue line), the two broad bands in the range of 10-30° were retained after reaction, also suggesting that the skeleton of  $\Delta_2R_6$ -Hp is maintained. The identical PXRD patterns no diffraction peaks of Au crystallite peaks are observed after the reaction, confirming the remarkable stability of the nanoclusters against aggregation.

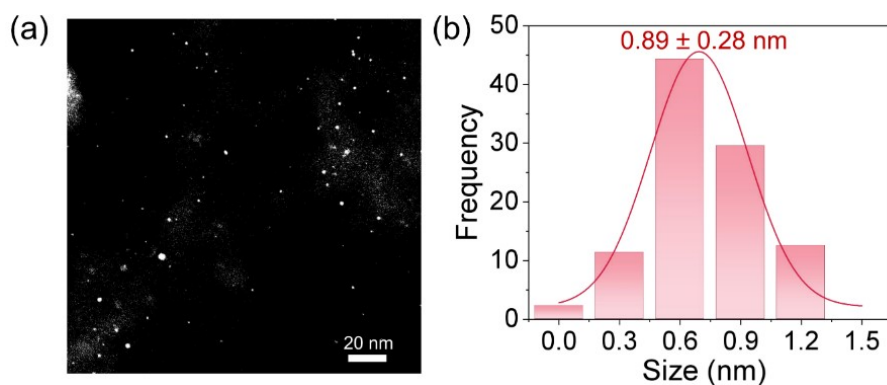

**Fig. S58** HAADF-STEM images of Au@ $\Delta_2R_6$ -Hp after catalytic cycles and the corresponding size distribution histogram of Au-NCs, revealing a size of  $0.89 \pm 0.28$  nm.

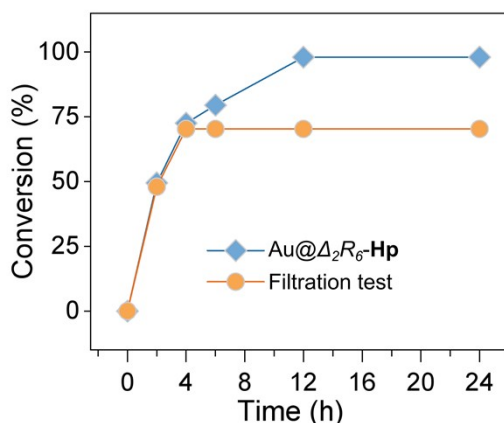

**Fig. S59** Time-dependent conversion of **AOB** and **AB** during **NB** reduction under standard conditions using **Au@ $\Delta_2R_6$ -Hp** (blue line), and after its removal by filtration at 4 h (orange line).

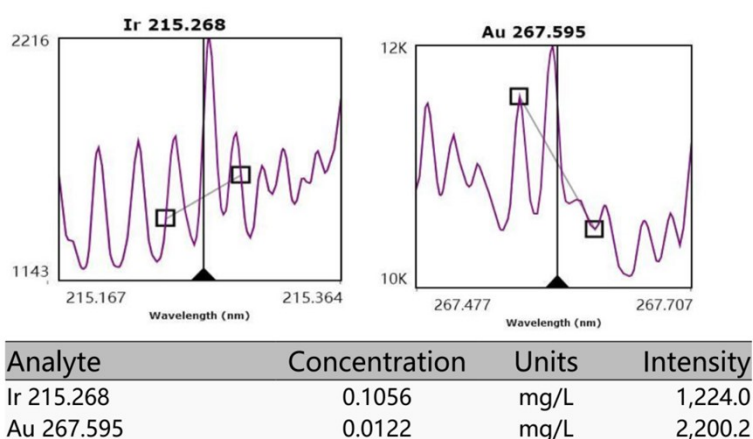

**Fig. S60** ICP-OES analysis of the supernatant after the **NB** reduction reaction following removal of **Au@ $\Delta_2R_6$ -Hp**, indicating negligible loss of Au during catalysis.

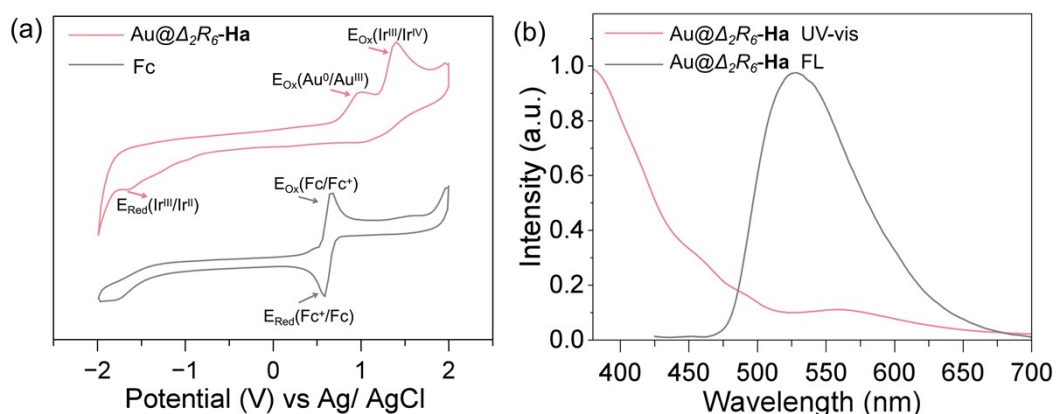

**Fig. S61** (a) Cyclic voltammograms of **Au@ $\Delta_2R_6$ -Hp** and **Fc** in dry  $\text{CH}_3\text{CN}$  solution containing 0.1 M  $n\text{-Bu}_4\text{NPF}_6$  under  $\text{N}_2$  atmosphere, showing redox couples of +1.18 and -1.80 (V vs Ag/AgCl) for  $\text{Ir}^{\text{IV}}/\text{Ir}^{\text{III}}$ . (b) Normalized absorption and emission spectra of **Au@ $\Delta_2R_6$ -Hp** ( $E_{0-0} = 2.55$  eV).

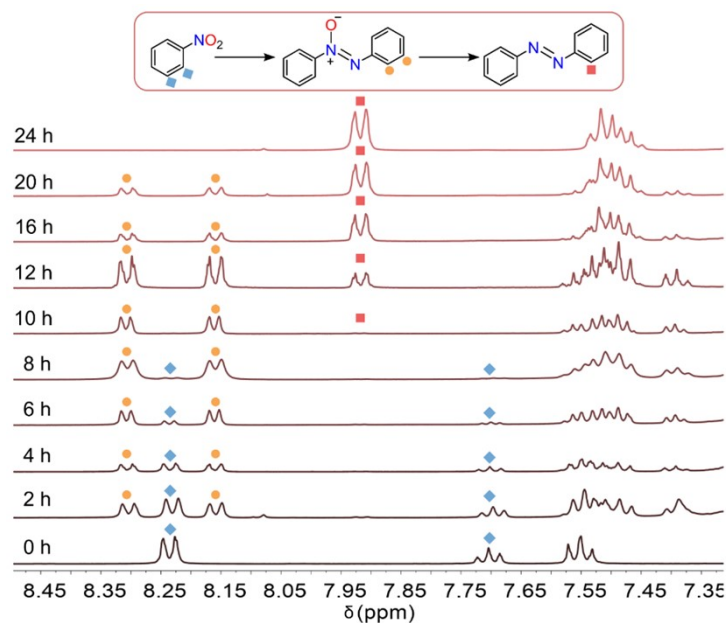

**Fig. S62**  $^1\text{H}$  NMR analysis of the catalytic transfer of **NB** to **AB** by  $\text{Au}@A_2R_6\text{-Hp}$  at different times (0-24 h) recorded in  $\text{CDCl}_3$ .

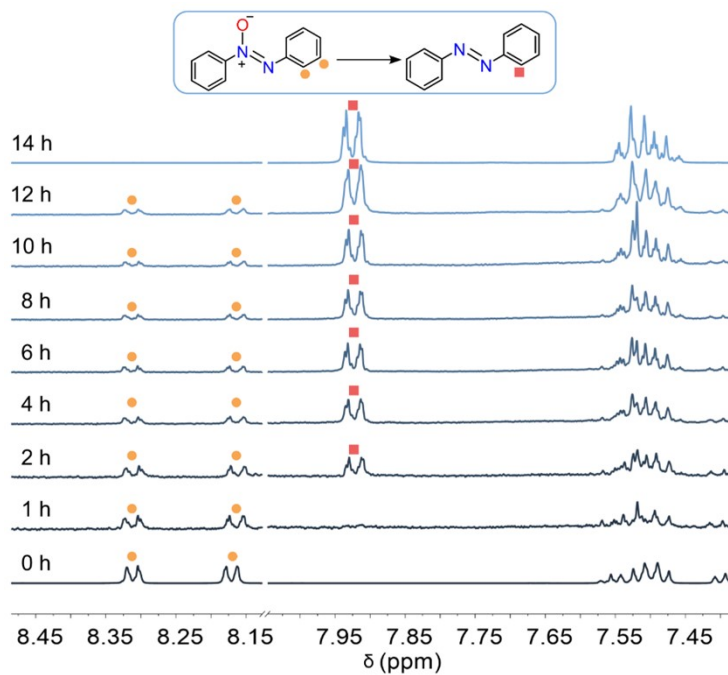

**Fig. S63**  $^1\text{H}$  NMR analysis of the catalytic transfer of **AOB** to **AB** by  $\text{Au}@A_2R_6\text{-Hp}$  at different times (0-14 h) recorded in  $\text{CDCl}_3$ .

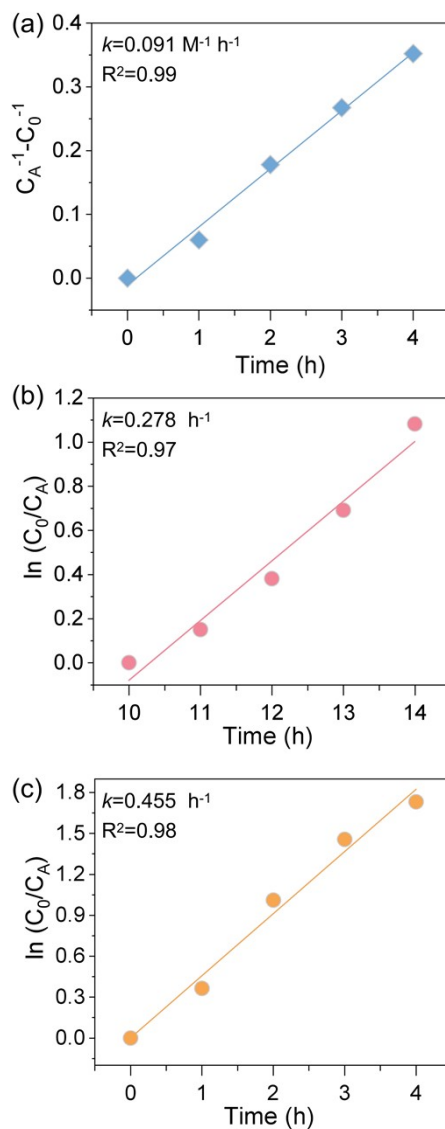

**Fig. S64** Kinetic analysis of Au@A<sub>2</sub>R<sub>6</sub>-Hp catalyzed reactions: (a) **NB** reduction (0-4 h); (b) **NB** reduction (10-14 h); and (c) **AOB** reduction (0-4 h).

**Note:** To experimentally probe **NB** involvement, kinetic studies were carried out by varying the initial **NB** concentration (0.05-0.15 mmol) while keeping other conditions constant. Conversion was measured at 30 min and remained below 20%. The apparent initial rate ( $v_0$ ) was calculated according to:

$$v_0 = \frac{C_0 - C_t}{t}$$

where  $C_0$  and  $C_t$  denote the initial and remaining **NB** concentrations, respectively, and  $t = 0.5 \text{ h}$ .

As shown in Fig. S62, a log-log plot of  $v_0$  versus  $C_0$  displays a linear relationship. Linear regression yields a slope of 2.247 with  $R^2 = 0.98$ , indicating an apparent second-order dependence on **NB** concentration. This kinetic behavior supports the formation of a reaction intermediate involving two **NB** molecules.

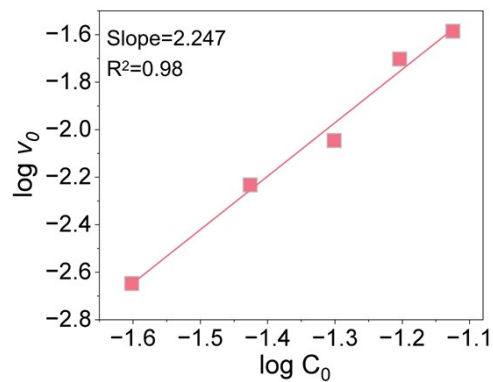

**Fig. S65** Log-log plot of the apparent initial rate ( $v_0$ ) versus the initial NB concentration ( $C_0$ ).

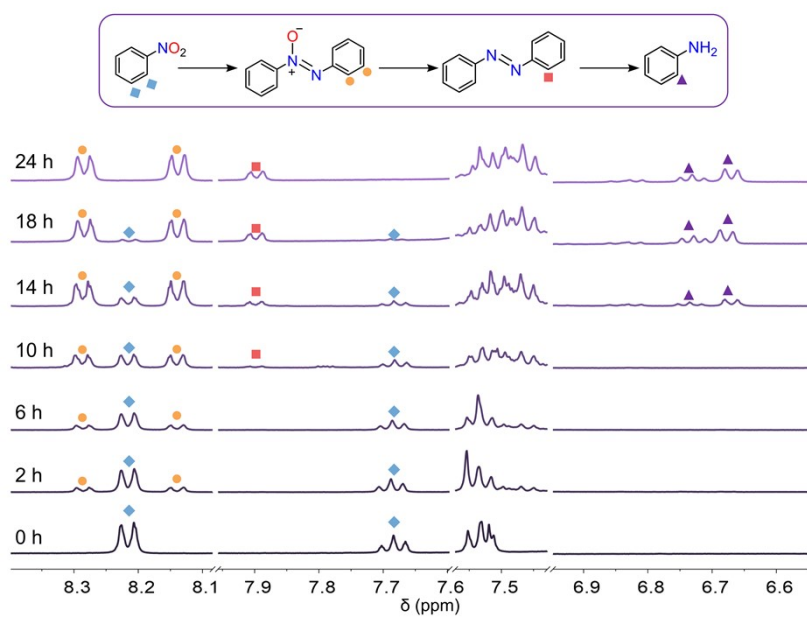

**Fig. S66** <sup>1</sup>H NMR analysis of the catalytic transfer of NB to AB by Au/ $\Delta_2R_6$ -Ha at different times (0-24 h) recorded in CDCl<sub>3</sub>.

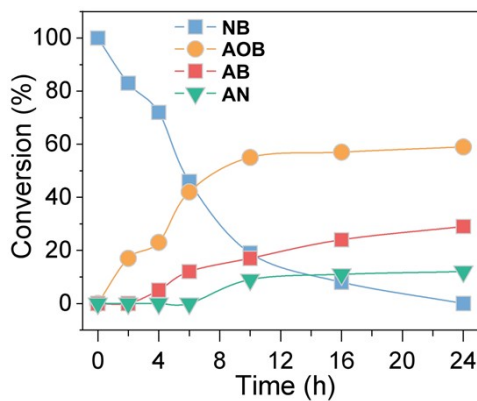

**Fig. S67** Kinetic variation of the NB reduction catalyzed by Au/ $\Delta_2R_6$ -Ha.

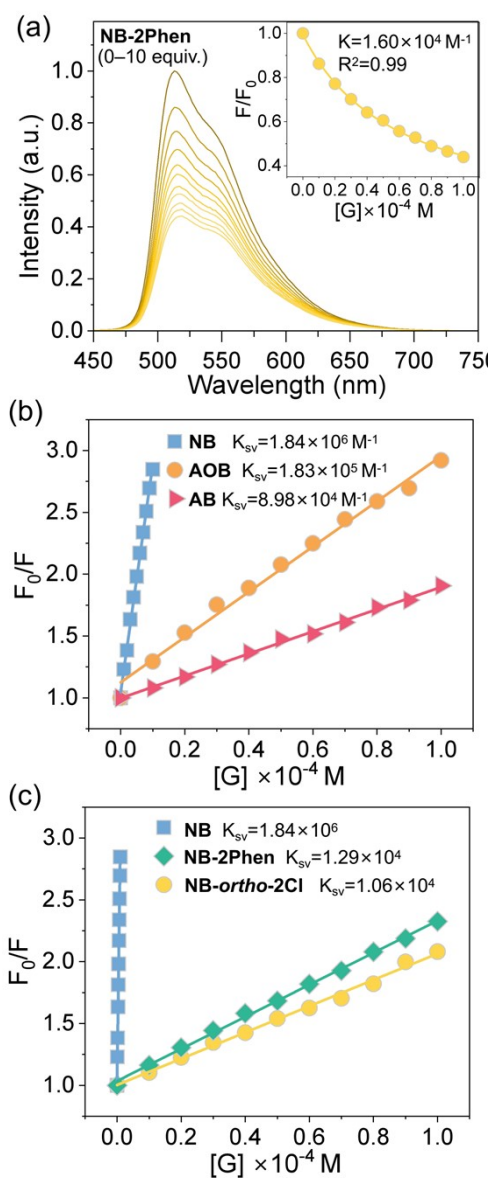

**Fig. S68** (a) Fluorescence quenching spectra of Au@A<sub>2</sub>R<sub>6</sub>-Ha (1.0 × 10<sup>-5</sup> M) titrated with NB-2Phen (0–10 equiv.). (b) Stern-Volmer plots for fluorescence quenching of Au@A<sub>2</sub>R<sub>6</sub>-Ha by NB, AOB and AB. (c) Stern-Volmer plots for fluorescence quenching of Au@A<sub>2</sub>R<sub>6</sub>-Ha by NB, NB-ortho-2Cl and NB-2Phen. F<sub>0</sub> and F are the emission intensity in the absence and presence of substrate, respectively; [G] is the concentration of the substrate. Binding (K) and Stern-Volmer constants (K<sub>sv</sub>) have been calculated using previously reported equations. [S1, S2]

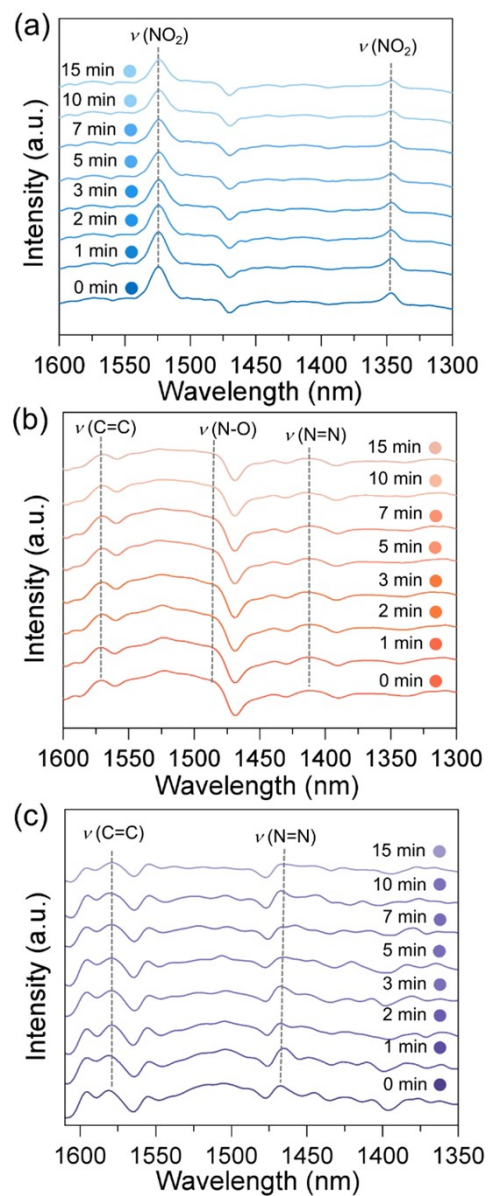

**Fig. S69** Time-dependent DRIFTS desorption of (a) **NB**, (b) **AOB** and (c) **AB** on  $\text{Au}@A_2R_6\text{-Ha}$ .

## Section 6. Computational Studies

### 6.1 Geometric structures optimized

#### 6.1.1 Geometry-optimized structure of $\Delta_2R_6$ -Ha and $\Delta_2R_6$ -Hp

**Note:** The observed differences in cavity dimensions of  $\Delta_2R_6$ -Hp arise from the electrostatic interactions, which modulate the cage geometry.

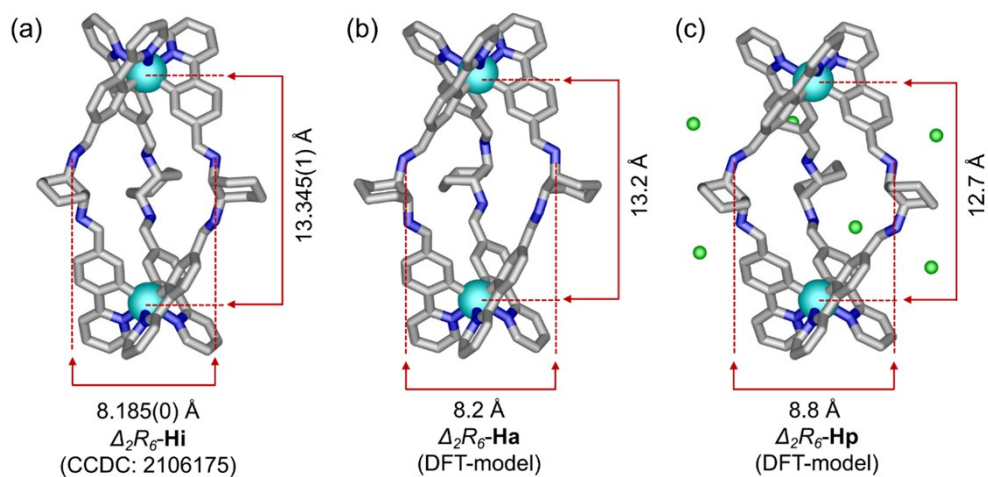

**Fig. S70** Geometry-optimized structure of  $\Delta_2R_6$ -Ha and  $\Delta_2R_6$ -Hp. Color code: Ir atom: cyan; N atom: blue; C atom: grey; Cl atom: green.

#### 6.1.2 Geometry-optimized structure of $\text{Au}@ \Delta_2R_6$ -Ha

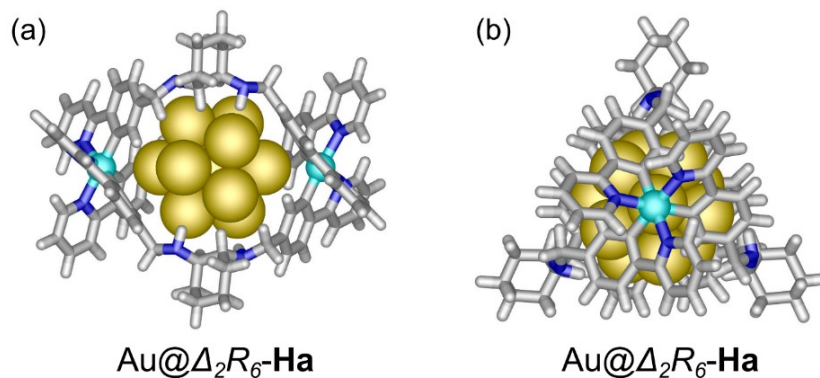

**Fig. S71** Geometry-optimized structure of  $\text{Au}@ \Delta_2R_6$ -Ha. Color code: Ir atom: cyan; Au-NCs: yellow; N atom: blue; C atom: grey; H atom: light grey.

### 6.13 Adsorption geometries

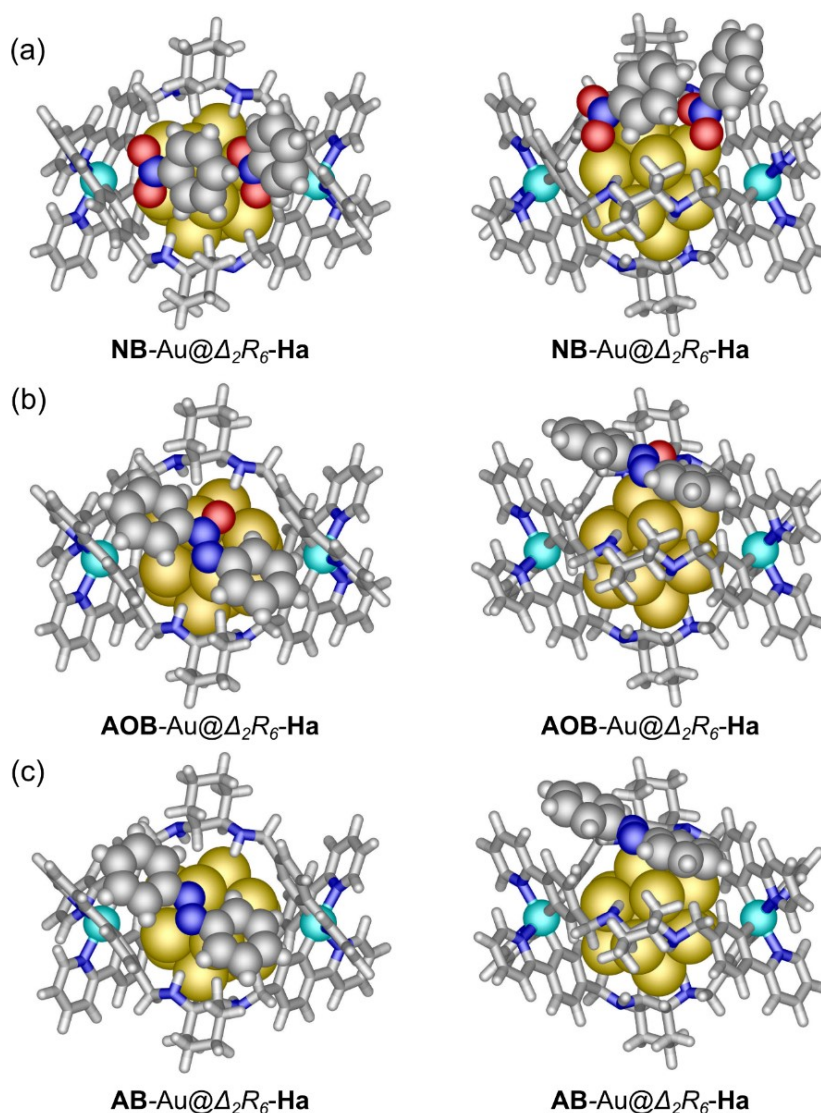

**Fig. S72** Adsorption geometries of (a)NB, (b) AOB and (c) AB on Au-NCs surface of Au@ $\Delta_2R_6$ -Ha. Color code: Ir atom: cyan; Au-NCs: yellow; N atom: blue; O atom: red; C atom: grey; H atom: light grey.

### 6.2 Reaction energies calculations

**Note:** The reaction pathways from nitrobenzene to azobenzene on the Au@ $\Delta_2R_6$ -Ha and the corresponding energy profiles were calculated. With Au@ $\Delta_2R_6$ -Ha, the adsorbed two NB can be to form \*NBs with reaction energy of -2.35 eV. Subsequent transfer of six H\* to two \*NBs can give rise to adsorbed \*AOB, which feature reaction energies of -2.58 eV. Subsequently, the \*AOB intermediate would be reduced to \*AB with an energy barrier of -1.40 eV. To evaluate the feasibility of further conversion, the hydrogenation of \*AB to \*2AN was calculated, revealing a high energy barrier of 3.62 eV. This significant barrier, combined with the elevated desorption energy of AN (2.44 eV), confirms the thermodynamic difficulty of 2AN formation in this system. The desorption energy of \*AB from Au-NCs (1.92 eV) is significantly lower than the activation barrier for its

hydrogenation to \*2AN (3.62 eV). These computational results perfectly align with experimental observations, revealing that Au@A<sub>2</sub>R<sub>6</sub>-Ha selectively catalyzes NB-to-AB conversion through this energetically favorable pathway while intentionally preventing over-reduction.

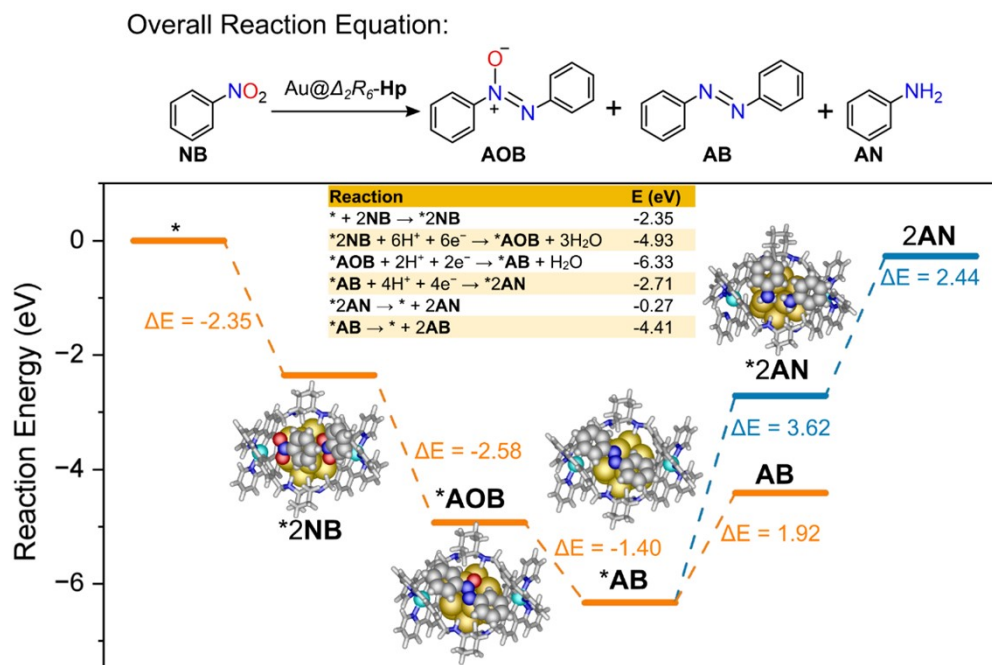

**Fig. S73** Relative energy variation along the reaction pathway for Au@A<sub>2</sub>R<sub>6</sub>-Ha. The inserted table is the reaction energy corresponding to specific reaction steps and figures are the optimized models of substrate/ product adsorption on the catalyst. Color code: Ir atom: cyan; Au-NCs: yellow; N atom: blue; O atom: red; C atom: grey; H atom: light grey.

## Section 7. <sup>1</sup>H NMR spectra of catalytic products

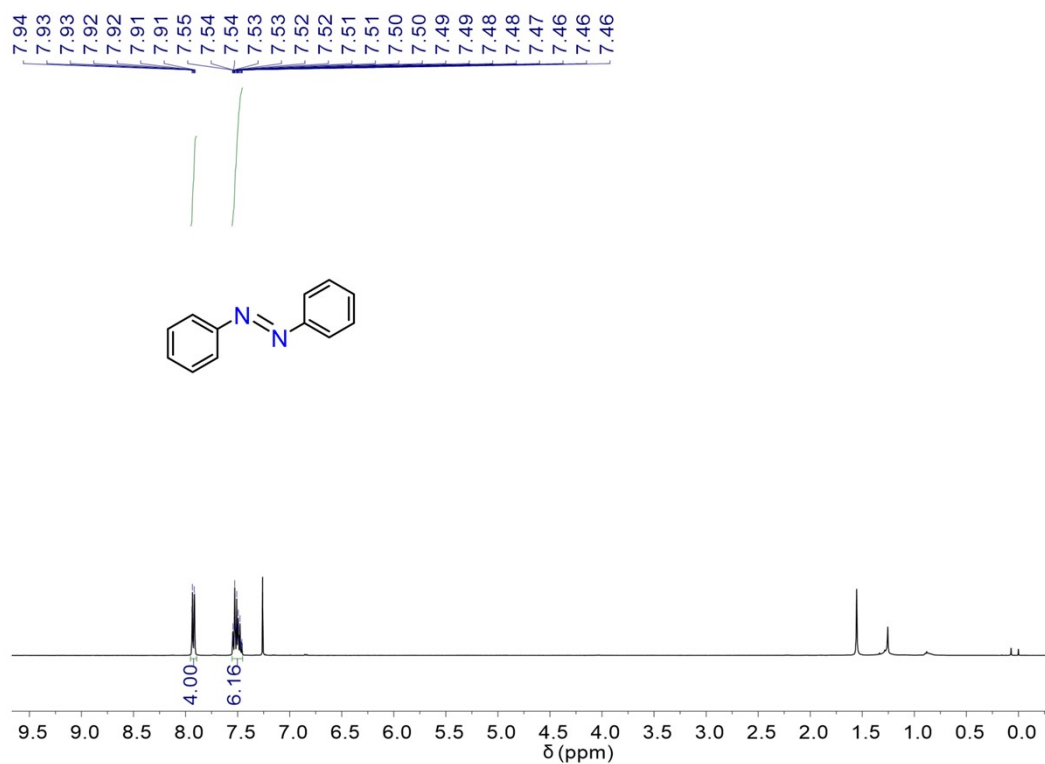

Fig. S74 <sup>1</sup>H NMR (400 MHz, CDCl<sub>3</sub>, 298 K) spectrum of **3a**.

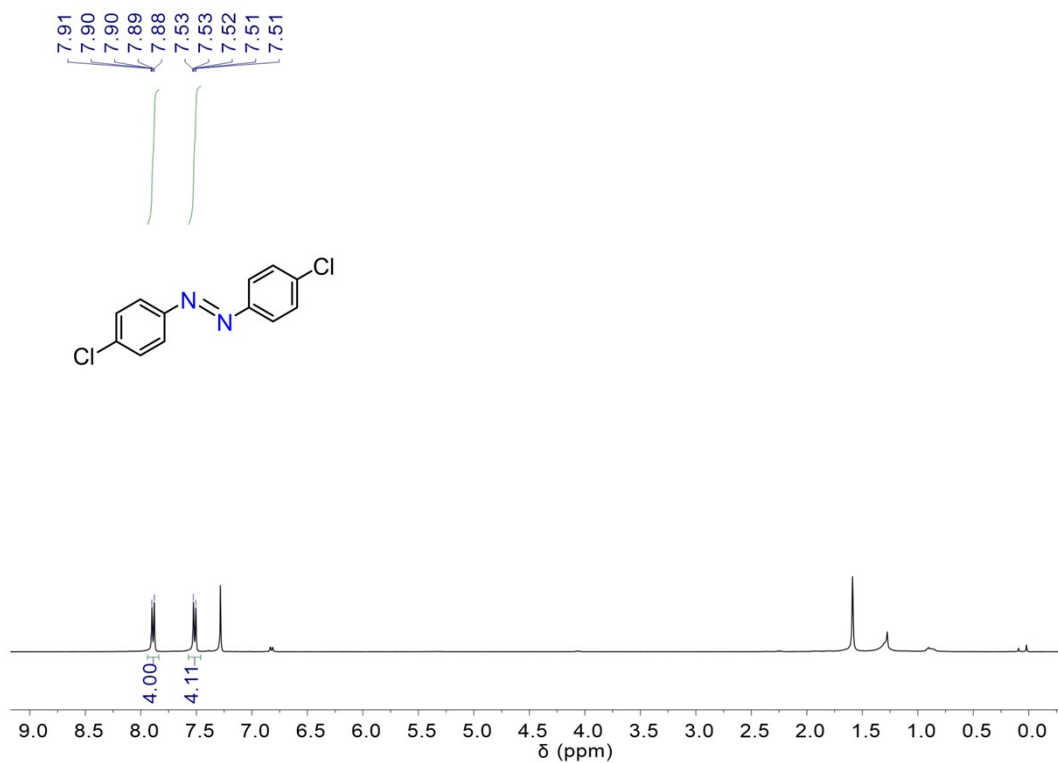

Fig. S75 <sup>1</sup>H NMR (400 MHz, CDCl<sub>3</sub>, 298 K) spectrum of **3b**.

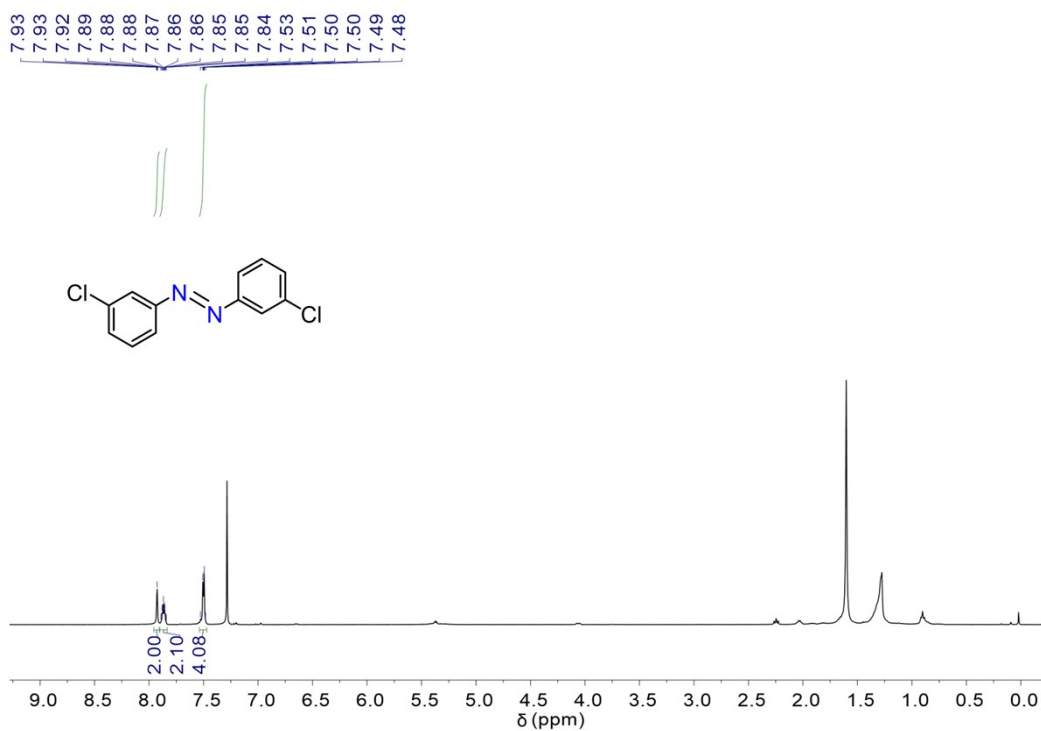

**Fig. S76**  $^1\text{H NMR}$  (400 MHz,  $\text{CDCl}_3$ , 298 K) spectrum of **3c**.

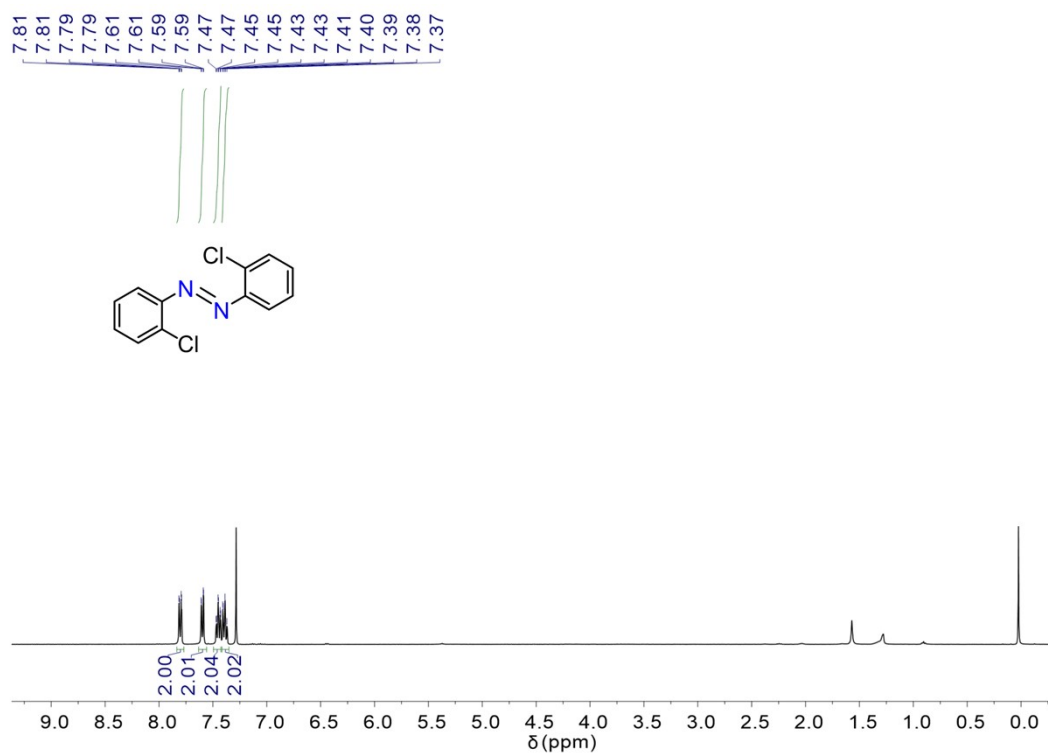

**Fig. S77**  $^1\text{H NMR}$  (400 MHz,  $\text{CDCl}_3$ , 298 K) spectrum of **3d**.

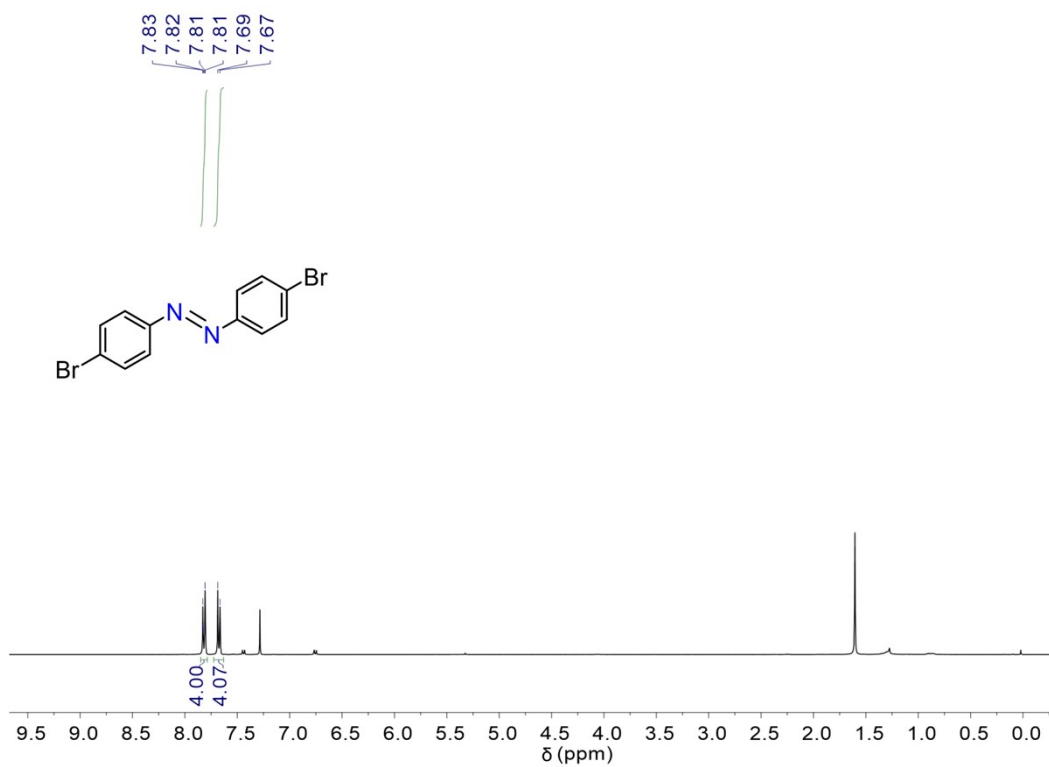

**Fig. S78** <sup>1</sup>H NMR (400 MHz, CDCl<sub>3</sub>, 298 K) spectrum of 3e.

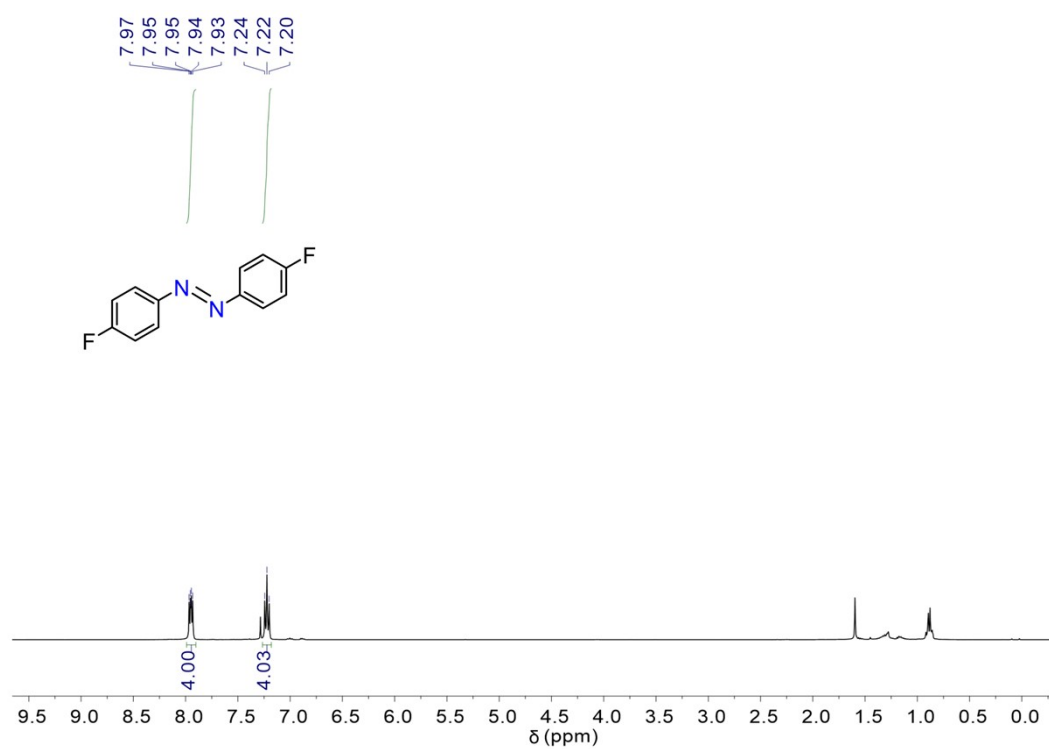

**Fig. S79** <sup>1</sup>H NMR (400 MHz, CDCl<sub>3</sub>, 298 K) spectrum of 3f.

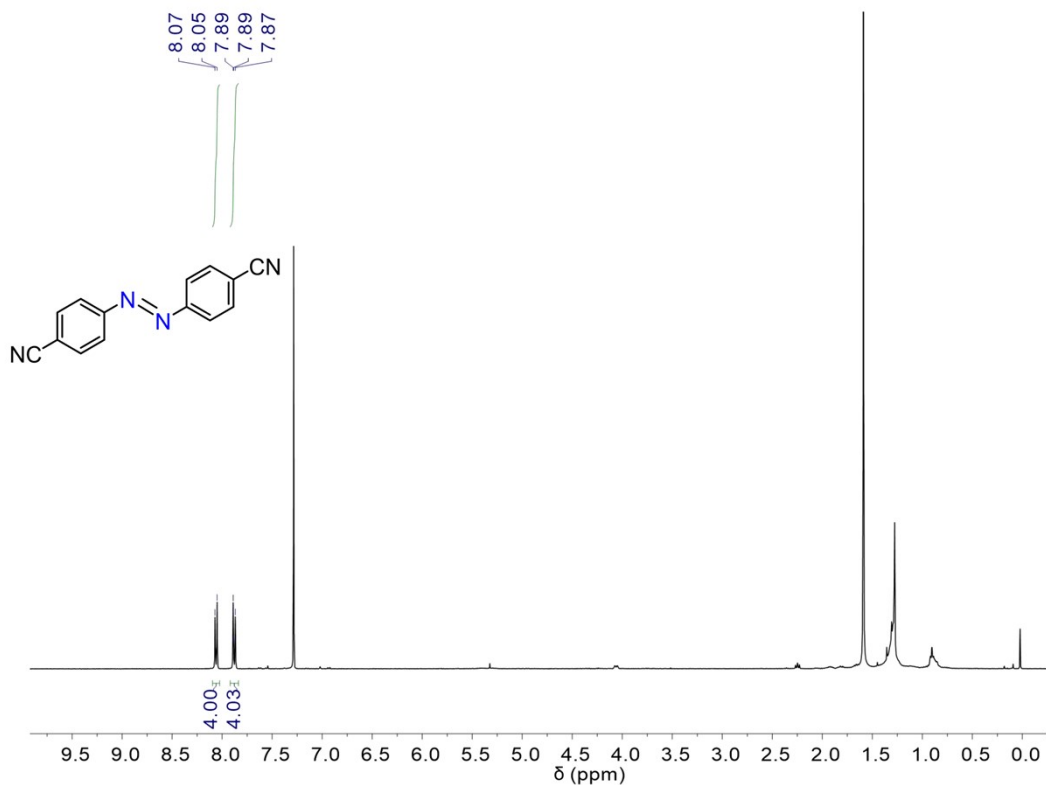

Fig. S80 <sup>1</sup>H NMR (400 MHz, CDCl<sub>3</sub>, 298 K) spectrum of 3g.

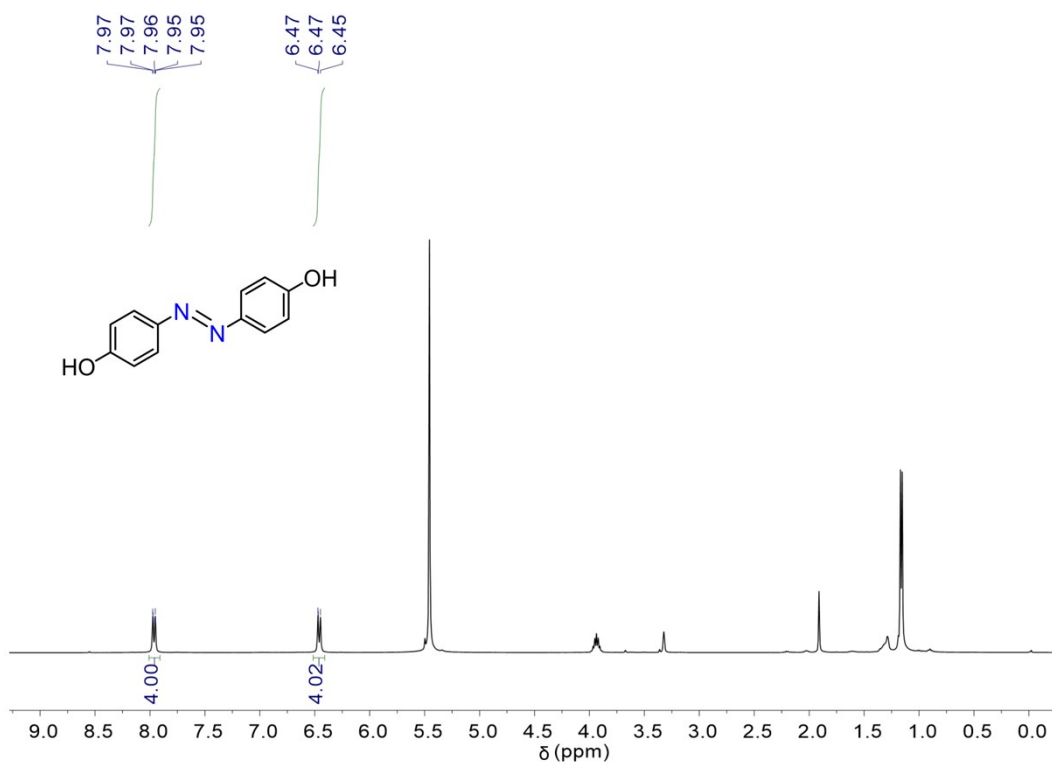

Fig. S81 <sup>1</sup>H NMR (400 MHz, CD<sub>3</sub>OD, 298 K) spectrum of 3h.

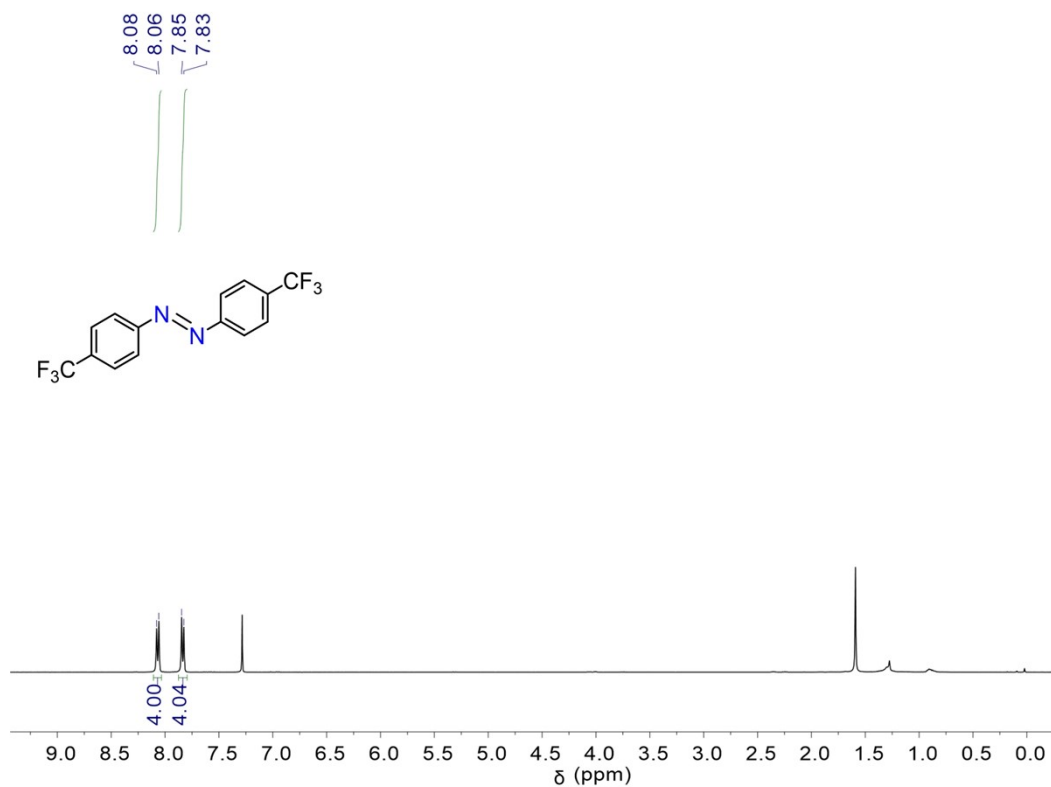

**Fig. S82** <sup>1</sup>H NMR (400 MHz, CDCl<sub>3</sub>, 298 K) spectrum of **3i**.

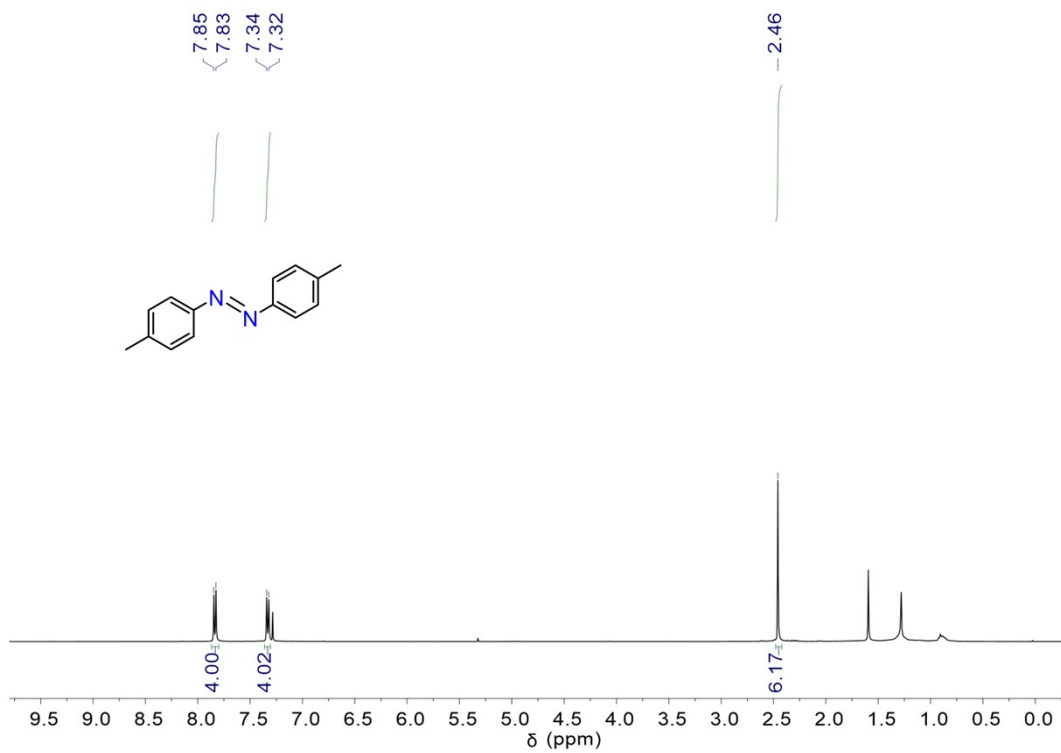

**Fig. S83** <sup>1</sup>H NMR (400 MHz, CDCl<sub>3</sub>, 298 K) spectrum of **3j**.

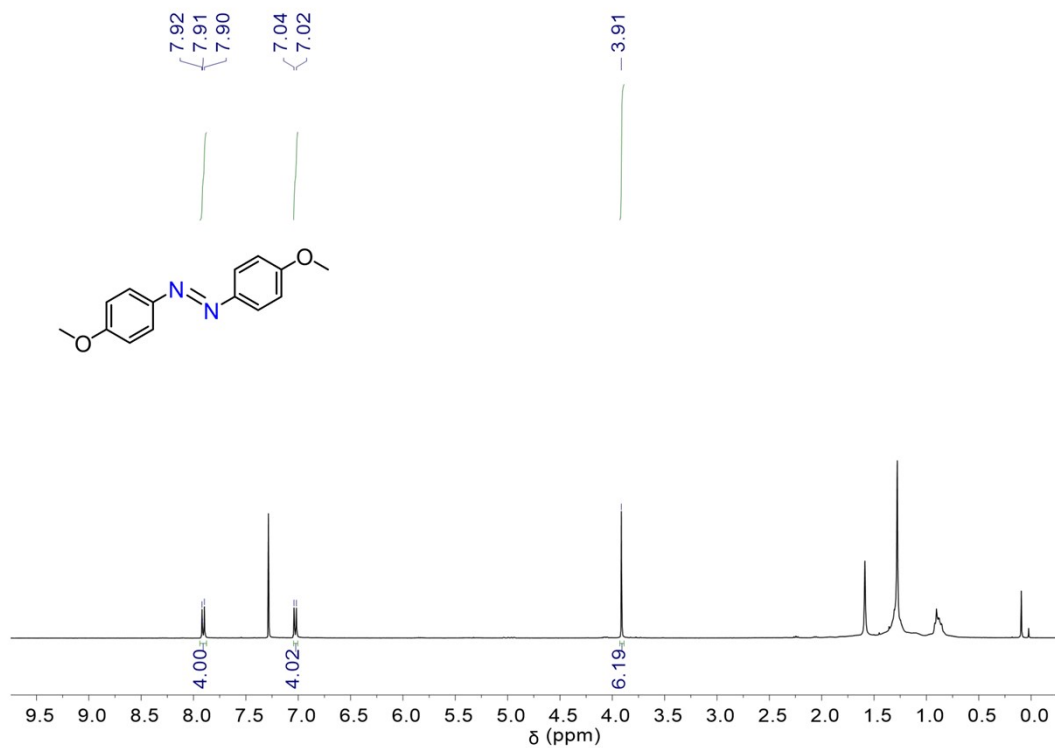

**Fig. S84** <sup>1</sup>H NMR (400 MHz, CDCl<sub>3</sub>, 298 K) spectrum of **3k**.

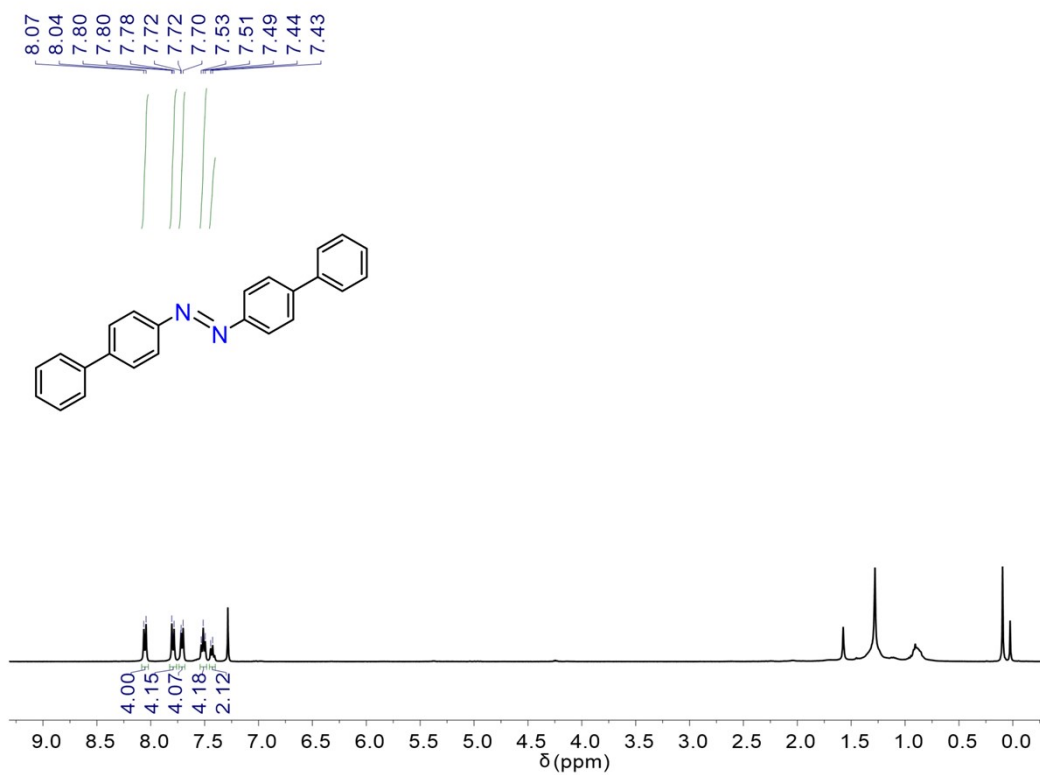

**Fig. S85** <sup>1</sup>H NMR (400 MHz, CDCl<sub>3</sub>, 298 K) spectrum of **3l**.

## Section 8. References

- [S1] P. Thordarson, Determining association constants from titration experiments in supramolecular chemistry, *Chem. Soc. Rev.*, 2011, **40**, 1305-1323.
- [S2] M. R. Eftink, in *Topics in Fluorescence Spectroscopy: Principles*, ed. J. R. Lakowicz, Fluorescence Quenching: Theory and Applications, Springer US, Boston, MA, 2002, 53-126.
- [S3] A. D. Becke, Density-functional thermochemistry. V. Systematic optimization of exchange-correlation functionals, *J. Chem. Phys.* **1997**, *107* (20), 8554-8560.
- [S4] S. Grimme, Semiempirical GGA-type density functional constructed with a long-range dispersion correction, *J. Comput. Chem.* **2006**, *27* (15), 1787-1799.
- [S5] P. J. Hay, W. R. Wadt, Ab initio effective core potentials for molecular calculations. Potentials for K to Au including the outermost core orbitals, *J. Chem. Phys.* **1985**, *82* (1), 270-283.
- [S6] G. A. Petersson, A. Bennett, T. G. Tensfeldt, M. A. Al-Laham, W. A. Shirley, J. A. Mantzaris, The total energies of closed-shell atoms and hydrides of the first-row elements, *J. Chem. Phys.* **1988**, *89* (4), 2193-2218.
- [S7] Gaussian 16, Revision B.01, M. J. Frisch, G. W. Trucks, H. B. Schlegel, G. E. Scuseria, M. A. Robb, J. R. Cheeseman, G. Scalmani, V. Barone, G. A. Petersson, H. Nakatsuji, X. Li, M. Caricato, A. V. Marenich, J. Bloino, B. G. Janesko, R. Gomperts, B. Mennucci, H. P. Hratchian, J. V. Ortiz, A. F. Izmaylov, J. L. Sonnenberg, D. Williams-Young, F. Ding, F. Lipparini, F. Egidi, J. Goings, B. Peng, A. Petrone, T. Henderson, D. Ranasinghe, V. G. Zakrzewski, J. Gao, N. Rega, G. Zheng, W. Liang, M. Hada, M. Ehara, K. Toyota, R. Fukuda, J. Hasegawa, M. Ishida, T. Nakajima, Y. Honda, O. Kitao, H. Nakai, T. Vreven, K. Throssell, J. A. Montgomery, J. E. Peralta, F. Ogliaro, M. J. Bearpark, J. J. Heyd, E. N. Brothers, K. N. Kudin, V. N. Staroverov, T. A. Keith, R. Kobayashi, J. Normand, K. Raghavachari, A. P. Rendell, J. C. Burant, S. S. Iyengar, J. Tomasi, M. Cossi, J. M. Millam, M. Klene, C. Adamo, R. Cammi, J. W. Ochterski, et.al., Gaussian, Inc., Wallingford CT, 2016.
- [S8] T. Lu, F. Chen, Multiwfn: A multifunctional wavefunction analyzer, *J. Comput. Chem.* **2012**, *33*, 580-592.
- [S9] T. Lu, A comprehensive electron wavefunction analysis toolbox for chemists, Multiwfn, *J. Chem. Phys.* **2024**, *161* (8), 082503.
- [S10] Z. Liu, T. Lu, Q. Chen, An sp-hybridized all-carboatomic ring, cyclo[18]carbon: Electronic structure, electronic spectrum, and optical nonlinearity, *Carbon* **2020**, *165*, 461-467.
- [S11] W. Humphrey, A. Dalke, K. Schulten, VMD: Visual molecular dynamics, *J. Mol. Graph.* **1996**, *14*, 33-38.
- [S12] J. Wu, X. Li, P. Wu, Z. Shi, L. Chen, R. Zhang, C. He, C. Duan, Engineering Homochiral Dinuclear Ir(III)-Metallohelix-Based Porous Molecular Crystals for Atropisomer Enantioseparation, *Chem. Mater.* **2022**, *34*, 4471-4478.
